# Supplementary material for: Surveying and mapping breast cancer services in Ghana: a cross-sectional pilot study in the Eastern Region
Source: PubMed Central journal article supplement — BMJ Open. 2021 Nov 24;11(11):e051122. doi: 10.1136/bmjopen-2021-051122 (PMC8627397; doi:10.1136/bmjopen-2021-051122), 2021-11-24
Supplement: bmjopen-2021-051122.draft_revisions.pdf [file bmjopen-2021-051122.draft_revisions.pdf]

# BMJ Open

BMJ Open is committed to open peer review. As part of this commitment we make the peer review history of every article we publish publicly available.

When an article is published we post the peer reviewers' comments and the authors' responses online. We also post the versions of the paper that were used during peer review. These are the versions that the peer review comments apply to.

The versions of the paper that follow are the versions that were submitted during the peer review process. They are not the versions of record or the final published versions. They should not be cited or distributed as the published version of this manuscript.

BMJ Open is an open access journal and the full, final, typeset and author-corrected version of record of the manuscript is available on our site with no access controls, subscription charges or pay-per-view fees (<http://bmjopen.bmj.com>).

If you have any questions on BMJ Open's open peer review process please email [info.bmjopen@bmj.com](mailto:info.bmjopen@bmj.com)

# BMJ Open

## Surveying and Mapping Breast Cancer Services in Ghana: A Cross-Sectional Pilot Study in the Eastern Region

|                               |                                                                                                                                                                                                                                                                                                                                                                                                                                                                                                                                                                                                                                                                                                                                                                                                                                                                                                                                                                                                                                                                                                                                                                                                                                                                                                                                                                                       |
|-------------------------------|---------------------------------------------------------------------------------------------------------------------------------------------------------------------------------------------------------------------------------------------------------------------------------------------------------------------------------------------------------------------------------------------------------------------------------------------------------------------------------------------------------------------------------------------------------------------------------------------------------------------------------------------------------------------------------------------------------------------------------------------------------------------------------------------------------------------------------------------------------------------------------------------------------------------------------------------------------------------------------------------------------------------------------------------------------------------------------------------------------------------------------------------------------------------------------------------------------------------------------------------------------------------------------------------------------------------------------------------------------------------------------------|
| Journal:                      | <i>BMJ Open</i>                                                                                                                                                                                                                                                                                                                                                                                                                                                                                                                                                                                                                                                                                                                                                                                                                                                                                                                                                                                                                                                                                                                                                                                                                                                                                                                                                                       |
| Manuscript ID                 | bmjopen-2021-051122                                                                                                                                                                                                                                                                                                                                                                                                                                                                                                                                                                                                                                                                                                                                                                                                                                                                                                                                                                                                                                                                                                                                                                                                                                                                                                                                                                   |
| Article Type:                 | Original research                                                                                                                                                                                                                                                                                                                                                                                                                                                                                                                                                                                                                                                                                                                                                                                                                                                                                                                                                                                                                                                                                                                                                                                                                                                                                                                                                                     |
| Date Submitted by the Author: | 11-Mar-2021                                                                                                                                                                                                                                                                                                                                                                                                                                                                                                                                                                                                                                                                                                                                                                                                                                                                                                                                                                                                                                                                                                                                                                                                                                                                                                                                                                           |
| Complete List of Authors:     | Moustafa, Moustafa; University of Utah Health, Center for Global Surgery<br>Mali, Meghan; University of Utah Health, Center for Global Surgery;<br>University of Utah Hospital, General Surgery<br>Lopez-Verdugo, Fidel; University of Utah Health, Center for Global Surgery<br>Sanyang, Ousman; University of Utah Health, Center for Global Surgery;<br>Edward Francis Small Teaching Hospital<br>Nellermoe, Jonathan; University of Utah Health, Center for Global Surgery<br>Price , Raymond ; University of Utah Health, Center for Global Surgery;<br>Intermountain Medical Center, General Surgery<br>Manortey, Stephen; Ensign College of Public Health<br>Biritwum-Nyarko, Alberta; Ghana Health Service, Eastern Regional Health Directorate<br>Ofei, Irina; Ghana Health Service, Eastern Regional Health Directorate<br>Sorensen, Justin; University of Utah, J. Willard Marriott Library<br>Goldsmith, Alison; University of Utah Health, Center for Global Surgery;<br>University of Utah Health, Obstetrics and Gynecology<br>Brownson, Kirstyn; University of Utah Health, Center for Global Surgery;<br>Huntsman Cancer Institute Cancer Hospital<br>Kumah, Augustine; Ghana Health Service, Eastern Regional Health Directorate; Nyaho Medical Centre<br>Sutherland, Edward; University of Utah Health, Center for Global Surgery; Ensign College of Public Health |
| Keywords:                     | Breast tumours < ONCOLOGY, Breast imaging < RADIOLOGY & IMAGING, Breast surgery < SURGERY, Organisation of health services < HEALTH SERVICES ADMINISTRATION & MANAGEMENT, Surgical pathology < PATHOLOGY                                                                                                                                                                                                                                                                                                                                                                                                                                                                                                                                                                                                                                                                                                                                                                                                                                                                                                                                                                                                                                                                                                                                                                              |
|                               |                                                                                                                                                                                                                                                                                                                                                                                                                                                                                                                                                                                                                                                                                                                                                                                                                                                                                                                                                                                                                                                                                                                                                                                                                                                                                                                                                                                       |

SCHOLARONE™  
Manuscripts

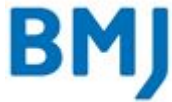

I, the Submitting Author has the right to grant and does grant on behalf of all authors of the Work (as defined in the below author licence), an exclusive licence and/or a non-exclusive licence for contributions from authors who are: i) UK Crown employees; ii) where BMJ has agreed a CC-BY licence shall apply, and/or iii) in accordance with the terms applicable for US Federal Government officers or employees acting as part of their official duties; on a worldwide, perpetual, irrevocable, royalty-free basis to BMJ Publishing Group Ltd ("BMJ") its licensees and where the relevant Journal is co-owned by BMJ to the co-owners of the Journal, to publish the Work in this journal and any other BMJ products and to exploit all rights, as set out in our [licence](#).

The Submitting Author accepts and understands that any supply made under these terms is made by BMJ to the Submitting Author unless you are acting as an employee on behalf of your employer or a postgraduate student of an affiliated institution which is paying any applicable article publishing charge ("APC") for Open Access articles. Where the Submitting Author wishes to make the Work available on an Open Access basis (and intends to pay the relevant APC), the terms of reuse of such Open Access shall be governed by a Creative Commons licence – details of these licences and which [Creative Commons](#) licence will apply to this Work are set out in our licence referred to above.

Other than as permitted in any relevant BMJ Author's Self Archiving Policies, I confirm this Work has not been accepted for publication elsewhere, is not being considered for publication elsewhere and does not duplicate material already published. I confirm all authors consent to publication of this Work and authorise the granting of this licence.

1  
2  
3  
4  
5  
6  
7  
8  
9  
10  
11 Surveying and Mapping Breast Cancer Services in Ghana: A Cross-Sectional Pilot Study in the Eastern  
12 Region  
13

14  
15 Moustafa K. Moustafa<sup>1\*</sup>, Meghan E. Mali<sup>1,2\*</sup>, Fidel Lopez-Verdugo<sup>1\*</sup>, Ousman Sanyang<sup>1,3,4</sup>, Jonathan  
16 Nellerroe<sup>1</sup>, Raymond R Price<sup>1,2,5</sup>, Stephen Manortey<sup>6</sup>, Alberta Biritwum-Nyarko<sup>7</sup>, Irina Ofei<sup>7</sup>, Justin  
17 Sorensen<sup>8</sup>, Alison Goldsmith<sup>1,9</sup>, Kirstyn E. Brownson<sup>1,2,10</sup>, Augustine Kumah<sup>7,11</sup>, Edward K. Sutherland<sup>1,6</sup>  
18  
19

20 Affiliations:

- 21 1 Center for Global Surgery, University of Utah School of Medicine, Salt Lake City, UT, USA  
22 2 Department of Surgery, University of Utah School of Medicine, Salt Lake City, UT, USA  
23 3 Edward Francis Small Teaching Hospital, Banjul, The Gambia  
24 4 School of Medicine and Allied Health Sciences, University of The Gambia, Banjul, The Gambia  
25 5 Department of Surgery, Intermountain Medical Center, Intermountain Healthcare  
26 6 Ensign College of Public Health, Kpong, Eastern Region, Ghana  
27 7 Ghana Health Service, Eastern Regional Health Directorate, Koforidua, Ghana  
28 8 J. Willard Marriott Library, University of Utah, Salt Lake City, UT, USA  
29 9 Department of Obstetrics and Gynecology, University of Utah School of Medicine, Salt Lake City,  
30 UT, USA  
31 10 Huntsman Cancer Institute, Salt Lake City, UT, USA  
32 11 Nyaho Medical Centre, Accra, Ghana  
33  
34

35  
36 \*Joint first authors  
37

38 **Corresponding Author**

39 Edward K. Sutherland, MD, MPH

40 Ensign College of Public Health, Kpong, Eastern Region, Ghana

41 Center for Global Surgery, University of Utah School of Medicine, Salt Lake City, UT, USA

42 Postal Address: P.O. Box AK 136, Akosombo, Eastern Region

43 Email: sutherlandmd@yahoo.com  
44  
45  
46  
47  
48  
49  
50  
51  
52  
53  
54  
55  
56  
57  
58  
59  
60



## ABSTRACT

### Objectives

Define the services available for the care of breast cancer at hospitals in the Eastern Region of Ghana, identify areas of the region with limited access to care through geospatial mapping, and test a novel survey instrument in anticipation of a nationwide scale up of the study.

### Design

A cross-sectional, facility-based survey study.

### Setting

This study was conducted at 33 of the 34 hospitals in the Eastern Region of Ghana.

### Participants

The 33 hospitals surveyed represented 97% of all hospitals in the region. This includes private, government, quasi-government, and faith-based organization owned hospitals.

### Results

82% of the hospitals surveyed provide basic screening services, 33% provide pathologic diagnosis, and 9% provide those services in addition to basic surgical care. Fifty-three percent, 64%, and 78% of the population live within 10 km, 25 km, and 45 km of screening, diagnostic, and treatment services respectively. Limited chemotherapy is available at 2 hospitals, endocrine therapy at 1 hospital, and radiotherapy is not available. Ninety-four percent of hospitals employ a general practitioner, 55% a radiology technician, and 39% a surgeon. Oncology specialists, pathology personnel, and a plastic surgeon are only available in 1 hospital in the Eastern Region.

### Conclusions

Although 82% of hospitals provide screening, only half the population lives within reasonable distance of these services. Few hospitals offer diagnosis and surgical services, but 64% and 78% of the population live within a reasonable distance of these hospitals. Geospatial analysis suggests two priorities to cost-effectively expand breast cancer services: 1) increase the number of health facilities providing screening services and 2) centralize basic imaging, pathologic, and surgical services at targeted hospitals.

### Strengths and limitations of this study

- This study accomplished a comprehensive assessment of breast cancer care available at 33 out of 34 hospitals in the Eastern Region of Ghana.
- Through geospatial analyses, areas of the region with limited access to services were identified and recommendations for expanding services with limited resources were able to be developed.
- Our study only evaluates geographic access to care and does not address other significant barriers in accessing care including transportation challenges, financial barriers, patient factors, facility capacity thresholds, and cultural factors.
- Only hospitals were surveyed for this study, so other health facilities that may provide some limited breast cancer screening or care services were not captured in this study.

### Funding Statement

This research received no specific grant from any funding agency in the public, commercial, or not-for-profit sectors. It was supported by the University of Utah Center for Global Surgery with no specific grant or award number.

### Competing Interests Statement

There are no conflicts of interest or competing interests to disclose. There are no financial relationships with any organizations that might have an interest in the submitted work in the previous three years and no other relationships or activities that could appear to have influenced the submitted work.

### Data Sharing Statement

Data detailing services available at diagnostic centers and non-governmental organization health facilities as well as information on cervical cancer services provided at the surveyed hospitals is available and was not included in this manuscript. For inquiries regarding the data please contact Dr. Edward Sutherland at sutherlandmd@yahoo.com. For inquiries regarding the survey tool and possible use in another country, please contact sutherlandmd@yahoo.com or rayrprice@comcast.net.

## Introduction

Breast cancer is the most common cancer and the leading cause of cancer-related death for women in Ghana.[1] Incidence of breast cancer is lower in sub-Saharan Africa (SSA) compared to North America, but current estimates suggest the incidence is increasing.[2] Outcomes vary widely across the continent, but 5-year survival is estimated to be around 35% for women in western SSA compared to the greater than 80% 5-year survival seen in high-income countries.[3–5] Some early stage breast cancers may be treated with surgery alone, but advanced disease requires complex multidisciplinary care. Given that 77% of black women in SSA have advanced disease (stage III or IV) at presentation,[6] expanding services that allow for early diagnosis of breast cancer, improving access to basic diagnostic and surgical treatment, and developing sites with more comprehensive care should be prioritized.

In 2011, Ghana's Ministry of Health (MOH) published the "National Strategy for Cancer Control in Ghana 2012-2016." This document outlines goals to improve early diagnosis of breast cancer through breast awareness, breast self-exam, and clinical breast exam (CBE). It also details targets for the expansion of cancer related equipment, infrastructure, and services at the various levels of health facilities across the country.[7] In this study, we aimed to delineate the current resources available for breast cancer care in the Eastern Region of Ghana and map these services to identify populations without geographic access to care. In addition, we aimed to test the survey instrument and administration process in anticipation of a nationwide scale up of this study. The MOH can use the information obtained from this project to evaluate progress towards the stated targets in their National Strategy and help direct resource implementation to improve access to care.

## Methods

A cross-sectional, facility-based survey was performed from March 2020 to May 2020 in Ghana's Eastern Region. This region was chosen for the pilot because the senior principal investigator (PI) for the project and our partners in the Ghana Health Service (GHS) live and work in the region. This provided our team with familiarity of the region and ensured the research assistants (RAs) would be geographically close to the senior PI if questions or concerns arose. The Eastern Region covers 8% of Ghana's landmass, is home to almost 3 million people, and is about 55% rural.[8] Targeted facilities included all hospitals in the region because hospitals are expected to provide the majority of care for breast cancer. Lists of hospitals in the region were obtained from databases of the Health Facilities Regulatory Agency and from the GHS. A total of 34 hospitals were identified, and 33 agreed to participate.

### *Survey Design*

The objective of the survey is to provide an assessment of a hospital's capacity to provide breast cancer care. The general framework for the survey is based on the World Health Organization's (WHO) Situational Analysis Tool for assessing emergency and essential surgical care and the Surgeons OverSeas (SOS) Personnel, Infrastructure, Procedure, Equipment, and Supplies (PIPES) tool for assessing surgical infrastructure.[9-10] Experts in breast cancer surgery, oncology, and global surgery reviewed the tool

1  
2  
3 and made key modifications. The final version was developed through expert consensus and input from  
4 local and international partners. The data entry form used by RAs in the field and a guide with expanded  
5 information on each question is available in supplemental materials (please note the full survey also  
6 includes assessment of cervical cancer services which is not reported in this article).  
7  
8

### 9 10 *Survey Structure*

11 General information about each hospital including address, GPS coordinates, facility type, and  
12 ownership was collected. Additional sections identifying the nature and quantity of personnel, imaging  
13 services, screening and diagnostic capacity, procedure and treatment options, surveillance, and follow  
14 up were also queried. Respondents were asked if a service is available at their facility (yes/no). "Yes"  
15 responses were specified as being always available (defined as greater than 80% of the time) or not  
16 always available. A sub-survey with additional questions about mammograms including number  
17 performed per month, patient cost, and who reviews the imaging was completed if a facility reported  
18 having a mammogram machine.  
19  
20  
21

22 The personnel section surveyed how many healthcare providers involved with breast cancer care are  
23 employed at each hospital. Medical doctors (MDs) included general medical practitioners, general and  
24 plastic surgeons, obstetricians and gynecologists (ob/gyns) as well as radiology, pathology, oncology,  
25 and radiation oncology specialists and consultants. Ob/gyns were included in the survey because they  
26 often perform CBE. Non-MD trained providers included radiology and pathology technicians, physician  
27 assistants (PAs), and social workers. Social workers were included because they are often involved with  
28 palliative care and patient counseling.  
29  
30  
31

### 32 33 *Survey Administration*

34 Four RAs familiar with the local geography were recruited via The Ensign College of Public Health  
35 (ECOPH) in Kpong, Ghana, located in the Eastern Region. The RAs participated in a week-long training  
36 course based at ECOPH. Training included didactic and field work components. The didactic portion  
37 detailed the study purpose and design and included an introductory clinical course on breast cancer and  
38 oncology basics. The field work component included proctored visits to local hospitals with gradually  
39 increased autonomy with survey administration. To promote consistency of the survey administration  
40 methods, all four RAs participated together in the initial portions of the study prior to traveling to their  
41 individually designated areas within the Eastern Region.  
42  
43  
44

45 Both paper and electronic copies of the survey were distributed to all hospital directors prior to site  
46 visits by the RAs. The survey was administered through a structured interview with key administrative  
47 personnel, the most knowledgeable clinical specialist (eg, Medical Director, Hospital Superintendent,  
48 etc.) of each facility, or the lead breast cancer specialist. If a question was encountered that the  
49 respondent did not know, the appropriate person within the hospital was contacted.  
50  
51  
52

### 53 54 *Hospital stratification*

55 In order to present the data in a meaningful manner, we developed a system to stratify hospitals based  
56 on the services they provide. The National Comprehensive Cancer Network's (NCCN) Framework for  
57  
58  
59

1  
2  
3 Resource Stratification of NCCN guidelines consists of three tiers: “Basic,” “Core,” and “Enhanced.”  
4 These tiers are intended to provide guidelines for appropriate care in a resource-limited  
5 environment.[11] Although these guidelines were not developed as a stratification system, their tiered  
6 structure provides an intuitive way to describe care available at each hospital. The three sets of  
7 guidelines for Invasive Breast Cancer and for Breast Cancer Screening and Diagnosis were closely  
8 reviewed by our researchers, and the services necessary to provide the care detailed in each guideline  
9 were listed and used as the basis for the stratification system (Table 1).[12-17] In order for a hospital to  
10 be categorized as a specific level, they need to offer all services for that level. In addition, the hospital  
11 has to offer the service greater than 80% of the time throughout the year, except as specified in Level 4.  
12  
13  
14  
15

16 We renamed the levels that reflect the NCCN “Basic,” “Core,” and “Enhanced” guidelines as Level 3, 2,  
17 and 1 respectively. The resources required to provide guideline-concordant care in a “Basic,” or Level 3  
18 hospital, are more extensive than what is available in the Eastern Region of Ghana. Thus, to better  
19 differentiate hospitals that offer limited services, we developed three additional levels: Level 6 is  
20 defined as hospitals that provide basic screening and clinical diagnosis, Level 5 hospitals provide  
21 screening, clinical diagnosis, and pathologic diagnosis, and Level 4 hospitals provide screening, clinical  
22 and pathologic diagnosis, and basic surgical services (Table 1). Hospitals that did not fulfill criteria for  
23 any of the levels were labeled as “Other”. The “Other” category includes hospitals that perform no  
24 breast cancer care as well as hospitals that offer some services, but are missing important components  
25 of breast cancer care (for example, a hospital that has an ultrasound and x-ray machine, but does not  
26 perform CBE).  
27  
28  
29  
30  
31  
32  
33  
34  
35  
36  
37  
38  
39  
40  
41  
42  
43  
44  
45  
46  
47  
48  
49  
50  
51  
52  
53  
54  
55  
56  
57  
58  
59  
60

| <b>Hospital Stratification</b>                                                                                                                                                                                                                                                                                                                                                                                                                                                                                                                                                                                                                                                                                                                                                                                                                                                                                                                                                                                                                                                                                                                                                                                                                                                                                                                                                                                                                                                                    |                                                                                                                                                                                                                                                                                                                                                                                                                                                                                                                                                                                                                                                                                                                                                                                                                                                                                                                                                                                                                                                                  |                                                                                                                                                                                                                                                                                                                                                                                                                                                                                                                                                                                                                                     |
|---------------------------------------------------------------------------------------------------------------------------------------------------------------------------------------------------------------------------------------------------------------------------------------------------------------------------------------------------------------------------------------------------------------------------------------------------------------------------------------------------------------------------------------------------------------------------------------------------------------------------------------------------------------------------------------------------------------------------------------------------------------------------------------------------------------------------------------------------------------------------------------------------------------------------------------------------------------------------------------------------------------------------------------------------------------------------------------------------------------------------------------------------------------------------------------------------------------------------------------------------------------------------------------------------------------------------------------------------------------------------------------------------------------------------------------------------------------------------------------------------|------------------------------------------------------------------------------------------------------------------------------------------------------------------------------------------------------------------------------------------------------------------------------------------------------------------------------------------------------------------------------------------------------------------------------------------------------------------------------------------------------------------------------------------------------------------------------------------------------------------------------------------------------------------------------------------------------------------------------------------------------------------------------------------------------------------------------------------------------------------------------------------------------------------------------------------------------------------------------------------------------------------------------------------------------------------|-------------------------------------------------------------------------------------------------------------------------------------------------------------------------------------------------------------------------------------------------------------------------------------------------------------------------------------------------------------------------------------------------------------------------------------------------------------------------------------------------------------------------------------------------------------------------------------------------------------------------------------|
| <p><b>LEVEL 1 (NCCN Enhanced)</b><br/> <b>Screening and clinical diagnosis</b><br/>                     -Clinical breast examination<br/>                     -Mammography</p> <p><b>Pathologic confirmation &amp; Imaging</b><br/>                     -Core needle biopsy<br/>                     -Skin punch biopsy<br/>                     -Pathological review (in house or external)<br/>                     -ER/PR status testing (in house or external)<br/>                     -HER2/neu status testing (in house or external)<br/>                     -Ultrasound<br/>                     -X Ray<br/>                     -Mammography<br/>                     -CT scan<br/>                     -Bone scan<br/>                     -Breast MRI<br/>                     -Genetic counseling and genetic testing</p> <p><b>Surgical treatment</b><br/>                     -Lumpectomy<br/>                     -Mastectomy<br/>                     -Axillary dissection<br/>                     -Sentinel lymph node biopsy<br/>                     -Breast reconstruction<br/>                     -Oophorectomy (or medical ovarian suppression)</p> <p><b>Non-surgical treatment</b><br/>                     -Chemotherapy<br/>                     -Radiotherapy<br/>                     -Endocrine therapy<br/>                     -Trastuzumab<br/>                     -Long term surveillance/follow up<br/>                     -Supportive/palliative care</p> | <p><b>LEVEL 2 (NCCN Core)</b><br/> <b>Screening and clinical diagnosis</b><br/>                     -Clinical breast examination</p> <p><b>Pathologic confirmation &amp; Imaging</b><br/>                     -Core needle biopsy<br/>                     -Pathological review (in house or external)<br/>                     -ER/PR status testing (in house or external)<br/>                     -Ultrasound<br/>                     -X Ray<br/>                     -Mammography</p> <p><b>Surgical treatment</b><br/>                     -Lumpectomy<br/>                     -Mastectomy<br/>                     -Axillary dissection<br/>                     -Sentinel lymph node biopsy<br/>                     -Oophorectomy (or medical ovarian suppression)</p> <p><b>Non-surgical treatment</b><br/>                     -Chemotherapy<br/>                     -Radiotherapy<br/>                     -Endocrine therapy<br/>                     -Long term surveillance/follow up<br/>                     -Supportive/palliative care</p> | <p><b>LEVEL 4</b><br/> <b>Screening and clinical diagnosis</b><br/>                     -Clinical breast examination</p> <p><b>Pathologic confirmation &amp; Imaging</b><br/>                     -Excisional biopsy, incisional biopsy, core needle biopsy, or fine needle aspiration cytology<br/>                     -Pathological review (in house or external)<br/>                     -Ultrasound<br/>                     -X Ray</p> <p><b>Surgical treatment</b><br/>                     -Mastectomy (always or sometimes available)*<br/>                     -Axillary dissection (always or sometimes available)*</p> |
|                                                                                                                                                                                                                                                                                                                                                                                                                                                                                                                                                                                                                                                                                                                                                                                                                                                                                                                                                                                                                                                                                                                                                                                                                                                                                                                                                                                                                                                                                                   | <p><b>LEVEL 3 (NCCN Basic)</b><br/> <b>Screening and clinical diagnosis</b><br/>                     -Clinical breast examination</p> <p><b>Pathologic confirmation &amp; Imaging</b><br/>                     -Excisional biopsy or incisional biopsy<br/>                     -Pathological review (in house or external)<br/>                     -ER/PR status testing (in house or external)<br/>                     -Ultrasound<br/>                     -X Ray<br/>                     -Mammography</p> <p><b>Surgical treatment</b><br/>                     -Mastectomy<br/>                     -Axillary dissection<br/>                     -Oophorectomy (or medical ovarian suppression)</p> <p><b>Non-surgical treatment</b><br/>                     -Endocrine therapy<br/>                     -Long term surveillance/follow up<br/>                     -Supportive/palliative care</p>                                                                                                                                                    | <p><b>LEVEL 5</b><br/> <b>Screening and clinical diagnosis</b><br/>                     -Clinical breast examination</p> <p><b>Pathologic confirmation &amp; Imaging</b><br/>                     -Excisional biopsy, incisional biopsy, core needle biopsy, or fine needle aspiration cytology<br/>                     -Pathological review (in house or external)<br/>                     -Ultrasound</p>                                                                                                                                                                                                                       |
|                                                                                                                                                                                                                                                                                                                                                                                                                                                                                                                                                                                                                                                                                                                                                                                                                                                                                                                                                                                                                                                                                                                                                                                                                                                                                                                                                                                                                                                                                                   |                                                                                                                                                                                                                                                                                                                                                                                                                                                                                                                                                                                                                                                                                                                                                                                                                                                                                                                                                                                                                                                                  | <p><b>LEVEL 6</b><br/> <b>Screening and clinical diagnosis</b><br/>                     -Clinical breast examination</p>                                                                                                                                                                                                                                                                                                                                                                                                                                                                                                            |
| <p><b>Table 1</b> Hospital Stratification. Detailed list of services required to be categorized under each hospital level. A hospital must have ALL listed services to be categorized under a specific level. These services must be available &gt;80% of the time throughout the year unless otherwise specified. Level 6 represents a hospital with the fewest breast cancer services.<br/>                     *"Sometimes available" includes hospitals that reported offering a service, but it is only available &lt;80% of the time throughout the year.</p>                                                                                                                                                                                                                                                                                                                                                                                                                                                                                                                                                                                                                                                                                                                                                                                                                                                                                                                               |                                                                                                                                                                                                                                                                                                                                                                                                                                                                                                                                                                                                                                                                                                                                                                                                                                                                                                                                                                                                                                                                  |                                                                                                                                                                                                                                                                                                                                                                                                                                                                                                                                                                                                                                     |

### *Mapping of available services*

Geographic Information Systems (GIS) technology was employed to derive the proximity of service availability and proportion of the population within a specified distance of key services. Each hospital location was geospatially visualized utilizing Esri ArcGIS Pro software (2020 Version 2.6) and proximity buffers extending outward in 5 kilometer (km) increments were generated. A 2018 LandScan population density raster from the Oak Ridge National Laboratory (Oak Ridge, TN), which depicts the dispersal of individuals throughout the region was used, and a zonal statistics tool was deployed to obtain population numbers contained within each of the 5 km proximity buffers. The results of the spatial analysis returned values for populations within each of the specified distances while presenting a visual representation of the data.

### *Hypothetical targeted resource allocation*

To observe the impact of a hypothetical targeted resource allocation, an additional spatial and population analysis was performed. The goal of this analysis was to evaluate access to breast cancer care after a modest addition of services at targeted hospitals. This hypothetical targeted resource allocation included two conditions aimed at modeling cost-effective expansion of care: 1) All hospitals were modeled to provide CBE. Under this assumption all hospitals are at least Level 6. 2) Hospitals that were missing only a single service in order to increase their level within the stratification system were modeled as if they provided that service. For example, a Level 6 hospital that only required addition of ultrasound services in order to be categorized as Level 5 was modeled as a Level 5 hospital.

### *Reasonable travel distance*

For the spatial and population analyses, reasonable travel distances were established as 10 km, 25 km, and 45 km for screening, pathologic diagnosis, and surgical care respectively. The Lancet Commission on Global Surgery (LCoGS) describes access for essential surgery as being within two hours of a facility performing care.[18] Given the numerous aspects of cancer care however, this threshold is not easily transferable, and there are no established thresholds that describe geographic access to cancer care. A Ghanaian study found that patients greater than 10 km from a health facility were less likely to utilize laboratory screening services, so 10 km was established as our screening threshold.[19] In South Africa, women who lived greater than 20 km from a diagnostic hospital were more likely to have advanced disease at time of breast cancer diagnosis, so we established 25 km as our diagnosis threshold.[20] For surgical management, we established 45 km as our distance threshold to keep travel time typically less than 1 hour. This is based on a Ghanaian study that found greater than 80% of respondents reported they would rarely or irregularly utilize available health services if travel time was one hour or greater.[21]

### *Data analysis*

Descriptive statistics are presented as frequency and percentages. The hospital that was not surveyed was removed from the dataset and analysis was only run on the 33 hospitals with completed surveys. Analysis was performed using R software version 3.6.2 (R Core Team, 2019).



### *Patient and Public Involvement*

The GHS through the Eastern Regional Health Directorate has been involved with the entirety of this study from the development of the study concept through implementation. Results have been presented to the GHS's Eastern Regional leadership, including a discussion of recommendations. These officials directly represent the public. Patients were not involved in this study.

### *Ethical Approval*

The study was reviewed with and approved by the Ethical Review Committee of the GHS, and was shared with the Regional Health Directorate of the Eastern Region.

### **Results**

Thirty-three out of the 34 hospitals in the Eastern Region were surveyed. The single hospital not surveyed was due to lack of response. Surveyed hospitals included one regional hospital, one municipal hospital, 20 district hospitals, and 11 hospitals with no special designation. Sixteen of the hospitals were owned by the state, nine were privately owned, six were owned by faith-based organizations, and two were quasi-government (hospitals with partial funding from the government).

A total of 350 healthcare workers involved with breast cancer care were reported across the 33 hospitals. Of these healthcare workers, 182 (56.2%) were MDs and 32 (97.0%) of the hospitals employ at least one MD. The 182 MDs included 130 (71.4%) general practitioners without a specialty, 20 (11.0%) general surgeons, 24 (13.2%) obstetricians and gynecologists, three (1.6%) radiology specialists, two (1.1%) oncology specialists, one (0.5%) pathology specialist, one (0.5%) pathology consultant, and one (0.5%) plastic surgeon. General practitioners were employed at 29 (87.9%) hospitals, general surgeons at 13 (39.4%) hospitals, and ob/gyns at 17 (51.5%). The second largest group of healthcare workers were PAs with a total of 112 in the region across 32 (97.0%) hospitals. Twenty-seven radiology technicians, three pathology technicians, and 26 social workers were also reported in the surveys. The 30 total radiology personnel (27 technicians and three specialists) were employed at 14 (42.4%) hospitals and the five pathology personnel (three technicians, one specialist, and one consultant) were all employed by the same hospital.

Breast cancer screening is mainly performed via CBE, and this was always available at 27 (81.8%) of the hospitals. None of the surveyed facilities had a mammogram machine. Ultrasound was available in 25 (75%) facilities, and x-ray machines were available in 19 (57%) facilities. One hospital (3.0%) had a CT scanner, while MRI machines and PET scans were not available in the region.

For the pathologic diagnosis of breast cancer, excisional biopsy was offered at 18 hospitals (54.5%). Five of these sites also performed fine needle aspiration and core needle biopsy and one additional hospital offered core needle biopsy only. Thirty (90.9%) hospitals use an external lab for pathology, and seven (21.2%) of these also had in house pathology services. Two (6.1%) hospitals utilized in house pathology services only. Only one (3.0%) hospital in the region had the capacity to perform immunohistochemistry to test for estrogen receptor (ER), progesterone receptor (PR), and human epidermal growth factor receptor 2 (HER2) status.



Thirteen hospitals (39.4%) provided surgery for the treatment of breast cancer. Six of these hospitals reported performing both mastectomy and wide local excision, and the other seven provided wide local excision only. Four of the hospitals that perform both mastectomy and wide local excision also perform axillary surgery, but no facilities perform sentinel lymph node biopsy.

Two hospitals (6.1%) offer chemotherapy for breast cancer. One of them offers CAF (cyclophosphamide, doxorubicin, and fluorouracil) and the other provides CMF (cyclophosphamide, methotrexate, fluorouracil) chemotherapy. One of these hospitals (3.0%) offers endocrine therapy with tamoxifen. Radiotherapy was not available in any of the surveyed hospitals. Palliative care was available at ten hospitals (30.3%).

When the hospital level stratification was applied, three hospitals were classified as Level 4, eight were categorized as Level 5, and 16 were classified as Level 6 (Figure 1 and Table 2). No facilities in the Eastern region could provide the full spectrum of care detailed in the NCCN Framework for Resource Stratification (Levels 1, 2, and 3). The three facilities that offer the most breast cancer services require the addition of mammogram, endocrine therapy, and testing for ER/PR status in order to provide Level 3 (NCCN Basic) care.[12]

|                                                | Number of Hospitals | Number of Hospitals after Hypothetical Targeted Resource Allocation |
|------------------------------------------------|---------------------|---------------------------------------------------------------------|
| Level 1 (NCCN Enhanced)                        | 0                   | 0                                                                   |
| Level 2 (NCCN Core)                            | 0                   | 0                                                                   |
| Level 3 (NCCN Basic)                           | 0                   | 0                                                                   |
| Level 4 (screening + path diagnosis + surgery) | 3                   | 6                                                                   |
| Level 5 (screening + path diagnosis)           | 8                   | 9                                                                   |
| Level 6 (screening)                            | 16                  | 18                                                                  |
| Other                                          | 6                   | 0                                                                   |

**Table 2** Number of hospitals in each stratification before and after hypothetical targeted resource allocation. The hypothetical targeted resource allocation included the following two conditions: 1) All hospitals were modeled to provide CBE. Under this assumption all hospitals are at least Level 6. 2) Hospitals that were missing only a single service in order to increase their level within the stratification system were modeled as if they provided that service.

1  
2  
3 The spatial analysis using LandScan population data found that 52% of the population in the Eastern  
4 Region lives within 10 km of a hospital that provides breast cancer screening with CBE (Figure 2A), 64%  
5 of the population lives within 25 km of pathologic diagnosis services (Figure 2B), and 78% of the  
6 population lives within 45 km of basic surgical care (Figure 2C). Assessment of the hypothetical targeted  
7 resource allocation previously detailed was then performed. Implementing the first condition of the  
8 hypothetical resource allocation, modeling all hospitals to provide CBE, would increase the population  
9 living within 10 km of basic screening from 52% to 60% (Figure 3A). This model impacts six hospitals that  
10 reported they do not perform or only sometimes perform CBE. Four of these hospitals would be  
11 upgraded to a Level 6, one would be upgraded to Level 5, and one would be upgraded to Level 4 with  
12 the addition of CBE only. For the second condition of the hypothetical resource allocation, one hospital  
13 was identified that required the addition of an ultrasound machine to be upgraded to Level 5 and two  
14 hospitals could be upgraded to Level 4 with the addition of an x-ray machine and breast biopsy,  
15 respectively (Table 2). If these services were added, the proportion of the population in the Eastern  
16 Region within 25 km of a hospital that provides both screening and pathologic diagnostic services would  
17 increase to 74% (from 64%) (Figure 3B). The population within 45 km of a hospital that provides  
18 screening, pathologic diagnosis, and basic surgical care would increase to 81% (from 78%) (Figure 3C).  
19  
20  
21  
22  
23  
24

## 25 Discussion

26 The WHO provides a stepwise framework to guide the development of a National Cancer Control  
27 Program. The first step involves an in-depth situational analysis to identify where gaps in care exist.[22]  
28 Breast cancer is the most common cancer in Ghana,[1] and its incidence is increasing across SSA,[2,23]  
29 so analyzing breast cancer services and access to care is increasingly important. While enumerating  
30 various services might be straightforward, measuring true access is complex. Existing frameworks to  
31 measure access to care recognize numerous factors as important including socio-cultural, demographic,  
32 geographic, psychological, and organizational factors.[24] Previous research in Ghana has identified  
33 many patient level factors including lack of knowledge about the disease, fear of treatment, financial  
34 concerns, religious and social factors, and preference for care from traditional healers as reasons for  
35 delays in accessing care or incomplete treatment.[25–27] In contrast, system level and geographic  
36 factors have not been well studied. In addition, since publication of the “National Strategy for Cancer  
37 Control in Ghana: 2012-2016,” which outlined goals for equipment and infrastructure at various  
38 hospitals, no follow up studies have been conducted.[7] Our survey of 33 hospitals provides a detailed  
39 situational analysis of personnel and services available for breast cancer care in the Eastern Region of  
40 Ghana.  
41  
42  
43  
44  
45

46 Geographic considerations in access to care are a key element in describing capacity. Several recent  
47 studies have demonstrated the impact that distance from care has on breast cancer presentation in SSA.  
48 The African Breast Cancer Disparities in Outcomes Cohort Study identified that distance to a diagnostic  
49 health facility was independently associated with a delay in diagnosis of greater than 3 months and late  
50 diagnosis (Stage III/IV) for women with breast cancer in Namibia, Uganda, and Zambia.[28] In Ethiopia,  
51 rural residence and a distance greater than 5 km from a cancer referral center were associated with a  
52 delay greater than three months between onset of symptoms and medical consultation.[29] Lastly, a  
53 diagnostic hospital in South Africa identified that their patients who lived farther from the hospital were  
54  
55  
56  
57  
58  
59  
60

1  
2  
3 more likely to have late stage (Stage III/IV) breast cancer at time of diagnosis.[20] By including spatial  
4 analyses, we are able to geographically describe the current service availability, identify areas most in  
5 need of enhanced care, and quantify the impact that various capacity improvements can have on  
6 population level access.  
7

8  
9 The first step of the care pathway for breast cancer involves screening and early clinical diagnosis, which  
10 the WHO describes as the “cornerstone of breast cancer control” owing to the impact that stage at  
11 diagnosis has on outcomes.[30] This is illustrated in a 2016 study of over 1,000 Ghanaian women with  
12 breast cancer, which found cumulative five-year survival rates of 91.94%, 59.93%, 33.95%, and 15.09%  
13 for stage 0 and I, II, III, and IV disease, respectively.[31] In our survey, we identified that no hospitals  
14 offer mammography. CBE is offered at 82% of the surveyed hospitals, but only about 50% of the  
15 population in the Eastern Region lives within 10 km of a Level 4, 5, or 6 hospital. If all hospitals started  
16 offering CBE, still only 60% of the population would be within 10 km of care. Given the limited access to  
17 screening and the fact that the majority of women in SSA present with late-stage disease,[6] guidance  
18 from the Breast Health Global Initiative suggests a focus on expansion of early detection services with  
19 CBE, rather than screening programs with mammography, should be prioritized.[32] Availability of CBE  
20 at non-hospital community level health facilities, which are more abundant and widespread than  
21 hospitals, is critical to expand services to reach a greater proportion of the population.  
22

23  
24  
25  
26 The next step of care, pathologic diagnosis, has been scarcely published about in Ghana. Estimates from  
27 a survey conducted by the International Academy of Pathology demonstrated limited access to  
28 pathology services in Ghana with only 30 pathologists in the entire country (1.1 per million  
29 population).[33] Our study reiterated the sparse availability of pathology services in Ghana with only  
30 one-third of hospitals meeting requirements for a Level 4 or 5 designation. We have identified the few  
31 hospitals offering in-house or send out pathology services and with GIS analysis found that 64% of the  
32 population in the Eastern Region lives within 25 km of a Level 4 or 5 hospital. Nine hospitals reported  
33 always or sometimes offering in-house pathologic review of breast biopsies, but only one of these  
34 hospitals employs formally trained pathology personnel. In addition, none of the facilities offering in-  
35 house services test for ER, PR, or HER2 status, which is crucial in guiding appropriate therapies for breast  
36 cancer.[34] Many hospitals surveyed send pathology to other laboratories for evaluation, but this also  
37 has limitations. Wait times of 2 weeks to 1 month for results were most frequently reported. Only one  
38 hospital uses an outside laboratory that performs ER/PR and HER2 testing. Development of surgical  
39 pathology services is time consuming and requires significant investment in equipment and education as  
40 demonstrated by the decade-long effort to develop pathology services at a teaching hospital in Kumasi,  
41 Ghana.[35] Because of this, further development of centralized pathology services with an emphasis on  
42 streamlining send out services should be prioritized as Ghana continues the long-term investment of  
43 increasing the pathology workforce.  
44  
45  
46  
47  
48  
49

50  
51 The final step in breast cancer care, treatment, requires several medical specialties and treatment  
52 modalities. Four hospitals surveyed provide basic surgical care with mastectomy and axillary dissection  
53 and two hospitals offer mastectomy only. Availability of non-surgical therapies are more restricted, with  
54 limited chemotherapy available at two hospitals, endocrine therapy at one hospital, and no  
55 radiotherapy services in the region. Although only three hospitals are categorized as Level 4,  
56  
57  
58  
59

1  
2  
3 representing that they perform screening, pathologic diagnosis, and basic surgical care, a large share of  
4 the population (78%) lives within 45 km of one of those facilities. Further study needs to be done in SSA  
5 and Ghana to evaluate “how far is too far” in regards to cancer treatment accessibility, especially for  
6 services such as chemotherapy and radiation therapy that require extended periods of treatment with  
7 multiple trips to the hospital. Until that information is available, we believe that centralizing care by  
8 expanding non-surgical services at hospitals already categorized as Level 4 is a reasonable strategy to  
9 expand services. This would help to centralize care for patients in one hospital, potentially minimizing  
10 travel-related barriers and expenses.  
11  
12  
13

14 The complex and interdisciplinary nature of cancer care makes reporting results of a situational analysis  
15 challenging. Presentation of data in a concise and actionable manner for use by the MOH and NGOs is  
16 crucial. This study takes the NCCN tiered guidelines as a starting point to define appropriate care across  
17 a spectrum of resource levels. The stratification makes it easy to identify what resources should be  
18 added next to expand care at a single facility. When applying this stratification system to hospitals in the  
19 Eastern Region, we identified that no hospitals had the resources to provide the care outlined in the  
20 NCCN “Basic” guidelines for low-resource areas.[12, 15] The lack of mammography services prevents all  
21 hospitals in the region from providing full care concurrent with the “Basic” guidelines, and lack of ER/PR  
22 testing is also a significant barrier.[12-14] By defining three additional “levels,” we were able to better  
23 describe the services available across the region. The GIS analysis added additional value to the survey  
24 results by determining the proportion of the population within a set distance from care. This type of  
25 analysis can be further utilized to evaluate the impact that potential resource allocation would have on  
26 the population, allowing for a more cost-effective and impactful expansion of care.  
27  
28  
29  
30  
31

### 32 **Limitations**

33  
34 There are a few limitations to address in this study. First, although it is modeled on PIPES and the WHO  
35 situational analysis tools, our novel survey tool is not validated. The importance of expanding tools that  
36 enumerate surgical services lies in the multidisciplinary nature of cancer care, which extends well  
37 beyond surgical treatment. Second, this analysis only assesses geographic access to services using an  
38 Euclidean “straight line” distance from care, rather than actual travel time. Our study does not evaluate  
39 other significant barriers to care including transportation challenges, financial barriers, patient factors  
40 such as breast cancer awareness, facility capacity thresholds, and cultural factors. This means that our  
41 population analysis likely overestimates the proportion of the population with access to breast cancer  
42 care. Third, only hospitals were surveyed, so there may be non-hospital health facilities and local  
43 healthcare workers offering select services that were not captured by our assessment. Because of the  
44 limited availability of resources observed in the included hospitals however, we believe it is unlikely  
45 these non-hospital facilities provide cancer services that would significantly change our estimations. In  
46 addition, one hospital declined to participate in the survey. This was a small hospital that would not be  
47 expected to provide comprehensive breast cancer services. In addition, it is geographically close to other  
48 hospitals that were surveyed, so is unlikely to have impacted our population analysis. Fourth, many  
49 hospitals employ locum doctors who work at more than one hospital. This may have inflated the  
50 absolute numbers of providers reported, but does not impact the number of hospitals that employ  
51  
52  
53  
54  
55  
56  
57  
58  
59  
60

1  
2  
3 specific providers. Lastly, as this study was confined to the Eastern Region, there may be facilities just  
4 beyond the borders in another region that provide care. This would skew the spatial analysis for areas  
5 along the border since individuals are able to access care in any region. We anticipate that the possibility  
6 of para-regional access will be more clearly elucidated in the ongoing nationwide expansion of this  
7 survey.  
8  
9

## 10 **Conclusions**

11  
12  
13 This study accomplishes an in-depth situational analysis of available breast cancer care in the Eastern  
14 Region of Ghana using a novel facility-based survey tool. Screening is performed with CBE due to the  
15 absence of mammography machines. Basic surgical care is available across the region, but  
16 chemotherapy is limited and radiotherapy is not available. By stratifying each hospital and performing  
17 GIS analysis to identify areas most in need of services, the results of the survey can be used by the MOH  
18 to target cost-effective and guideline-concordant resource allocation to improve breast cancer care in  
19 Ghana. Based on the results of the study, we suggest two priorities in the Eastern Region: 1) expansion  
20 of screening and early diagnosis services with CBE by ensuring it is available at all hospitals, and  
21 leveraging providers at non-hospital health facilities to provide CBE, and 2) centralize treatment  
22 (surgery, chemotherapy, and radiotherapy services) to select hospitals to help streamline patient care  
23 until resources are available to expand services in more hospitals across the region.  
24  
25  
26  
27  
28  
29  
30  
31  
32  
33  
34  
35  
36  
37  
38  
39  
40  
41  
42  
43  
44  
45  
46  
47  
48  
49  
50  
51  
52  
53  
54  
55  
56  
57  
58  
59  
60

## Citations

- 1 The Global Cancer Observatory: Globocan 2020, Ghana, 2020.  
<https://gco.iarc.fr/today/data/factsheets/populations/288-ghana-fact-sheets.pdf>.
- 2 Adeloje D, Sowunmi OY, Jacobs W, *et al*. Estimating the incidence of breast cancer in Africa: a systematic review and meta-analysis. *J Glob Health* 2018;8:010419.
- 3 Allemani C, Matsuda T, Di Carlo V, *et al*. Global surveillance of trends in cancer survival 2000-14 (CONCORD-3): analysis of individual records for 37 513 025 patients diagnosed with one of 18 cancers from 322 population-based registries in 71 countries. *Lancet* 2018;391:1023–75.
- 4 McCormack V, McKenzie F, Foerster M, *et al*. Breast cancer survival and survival gap apportionment in sub-Saharan Africa (ABC-DO): a prospective cohort study. *Lancet Glob Health* 2020;8:e1203–12.
- 5 Ssentongo P, Lewcun JA, Candela X, *et al*. Regional, racial, gender, and tumor biology disparities in breast cancer survival rates in Africa: A systematic review and meta-analysis. *PLoS One* 2019;14:e0225039.
- 6 Jedy-Agba E, McCormack V, Adebamowo C, *et al*. Stage at diagnosis of breast cancer in sub-Saharan Africa: a systematic review and meta-analysis. *Lancet Glob Health* 2016;4:e923–35.
- 7 Ministry of Health, Ghana, National Strategy for Cancer Control in Ghana 2012-2016, 2011.  
<https://www.iccp-portal.org/sites/default/files/plans/Cancer%20Plan%20Ghana%202012-2016.pdf>
- 8 Eastern Regional Co-ordinating Council, Eastern Regional Official Website: Profile of the Eastern Region, 2016. <http://www.easternregion.gov.gh/index.php/profile/>.
- 9 World Health Organization (WHO), WHO Global Initiative for Emergency and Essential Surgical Care, 25 September 2019.<http://www.who.int/surgery/globalinitiative/en/>.
- 10 Surgeons Overseas, SOS PIPES Surgical Capacity Assessment Tool. 2017.  
[http://www.adamkushnermd.com/files/PIPES\\_tool\\_103111.pdf](http://www.adamkushnermd.com/files/PIPES_tool_103111.pdf)
- 11 National Comprehensive Cancer Network, NCCN Framework for Resource Stratification of NCCN Guidelines (NCCN Framework™), 2021. <https://www.nccn.org/framework/default.aspx>.
- 12 National Comprehensive Cancer Network. Invasive Breast Cancer: Basic Resources Version 2.2017, 2018.[https://www.nccn.org/professionals/physician\\_gls/pdf/breast\\_basic.pdf](https://www.nccn.org/professionals/physician_gls/pdf/breast_basic.pdf).
- 13 National Comprehensive Cancer Network. Invasive Breast Cancer: Core Resources Version 2.2017, 2018. [https://www.nccn.org/professionals/physician\\_gls/pdf/breast\\_core.pdf](https://www.nccn.org/professionals/physician_gls/pdf/breast_core.pdf).
- 14 National Comprehensive Cancer Network. Invasive Breast Cancer: Enhanced Resources Version 2.2017, 2018. [https://www.nccn.org/professionals/physician\\_gls/pdf/breast\\_enhanced.pdf](https://www.nccn.org/professionals/physician_gls/pdf/breast_enhanced.pdf).
- 15 National Comprehensive Cancer Network. Breast Cancer Screening and Diagnosis: Basic Resources Version 3.2018, 2018. [https://www.nccn.org/professionals/physician\\_gls/pdf/breast-screening\\_basic.pdf](https://www.nccn.org/professionals/physician_gls/pdf/breast-screening_basic.pdf).
- 16 National Comprehensive Cancer Network. Breast Cancer Screening and Diagnosis: Core Resources



- Version 3.2018, 2018. [https://www.nccn.org/professionals/physician\\_gls/pdf/breast-screening\\_core.pdf](https://www.nccn.org/professionals/physician_gls/pdf/breast-screening_core.pdf).
- 17 National Comprehensive Cancer Network. Breast Cancer Screening and Diagnosis: Enhanced Resources Version 3.2018, 2018. [https://www.nccn.org/professionals/physician\\_gls/pdf/breast-screening\\_enhanced.pdf](https://www.nccn.org/professionals/physician_gls/pdf/breast-screening_enhanced.pdf).
- 18 Meara JG, Greenberg SLM. The Lancet Commission on Global Surgery Global surgery 2030: Evidence and solutions for achieving health, welfare and economic development. *Surgery* 2015;157:834–5.
- 19 Der JB, Grint D, Narh CT, *et al*. Where are patients missed in the tuberculosis diagnostic cascade? A prospective cohort study in Ghana. *PLoS One* 2020;15:e0230604.
- 20 Dickens C, Joffe M, Jacobson J, *et al*. Stage at breast cancer diagnosis and distance from diagnostic hospital in a periurban setting: a South African public hospital case series of over 1,000 women. *Int J Cancer* 2014;135:2173–82.
- 21 Buor D. Analysing the primacy of distance in the utilization of health services in the Ahafo-Ano South district, Ghana. *Int J Health Plann Manage* 2003;18:293–311.
- 22 World Health Organization (WHO), National Cancer Control Programmes (NCCP), 3 February 2017. <http://www.who.int/cancer/nccp/en/>.
- 23 Joko-Fru WY, Jedy-Agba E, Korir A, *et al*. The evolving epidemic of breast cancer in sub-Saharan Africa: Results from the African Cancer Registry Network. *Int J Cancer* 2020;147:2131–41.
- 24 Gurch Randhawa KR. Access to Healthcare: Issues of Measure and Method. *Prim Health Care Res Dev* 2013;03. doi:10.4172/2167-1079.1000136
- 25 Obrist M, Osei-Bonsu E, Awuah B, *et al*. Factors related to incomplete treatment of breast cancer in Kumasi, Ghana. *Breast* 2014;23:821–8.
- 26 Clegg-Lampsey J, Dakubo J, Attobra YN. Why do breast cancer patients report late or abscond during treatment in Ghana? A pilot study. *Ghana Med J* 2009;43:127–31.
- 27 Agbokey F, Kudzawu E, Dzodzomenyo M, *et al*. Knowledge and Health Seeking Behaviour of Breast Cancer Patients in Ghana. *Int J Breast Cancer* 2019;2019:5239840.
- 28 Togawa K, Anderson BO, Foerster, M, *et al*. Geospatial barriers to healthcare access for breast cancer diagnosis in sub-Saharan African settings: The African Breast Cancer–Disparities in Outcomes Cohort Study. *Int J Cancer* 2020;1-15.
- 29 Tesfaw A, Demis S, Munye T, Ashuro Z. Patient delay and contributing factors among breast cancer patients at two cancer referral centres in Ethiopia: A cross-sectional study. *J Multidiscip Healthc* 2020;13:1391-1401.
- 30 World Health Organization (WHO), Breast Cancer: Prevention and Control, 2016. <https://www.who.int/cancer/detection/breastcancer/en/>.

- 1  
2  
3 31 Mensah AC, Yarney J, Nokoe SK, *et al.* Survival outcomes of breast cancer in Ghana: an analysis of  
4 clinicopathological features. *Open Access Library Journal* 2016;3:1–11.  
5  
6 32 Ginsburg O, Yip C-H, Brooks A, *et al.* Breast cancer early detection: A phased approach to  
7 implementation. *Cancer* 2020;126 Suppl 10:2379–93.  
8  
9 33 African Strategies for Advancing Pathology, IAP Survey Results Summary: Summary for Ghana,  
10 2019. <http://www.pathologyinafrica.org/surveydata/summary-data-country.php?id=020>.  
11  
12 34 Hunt KK, Mittendorf EA. Diseases of the Breast. In: Townsend CM, Beauchamp RD, Evers BM, *et al.*,  
13 eds. *Sabiston textbook of surgery: the biological basis of modern surgical practice*.  
14 Elsevier/Saunders 2017:819–64.  
15  
16 35 Stalsberg H, Adjei EK, Owusu-Afriyie O, *et al.* Sustainable Development of Pathology in Sub-Saharan  
17 Africa: An Example From Ghana. *Arch Pathol Lab Med* 2017;141:1533–9.  
18  
19  
20  
21  
22  
23  
24  
25  
26  
27  
28  
29  
30  
31  
32  
33  
34  
35  
36  
37  
38  
39  
40  
41  
42  
43  
44  
45  
46  
47  
48  
49  
50  
51  
52  
53  
54  
55  
56  
57  
58  
59  
60



### Author Contribution Statement

All authors discussed the results of the project, critically revised the manuscript, and approved the final version. In addition, the following authors had additional responsibilities: M.K.M. designed and organized the project, oversaw data collection, and wrote the manuscript with M.E.M. and F.L-V. M.E.M. and F.L-V. analyzed and interpreted the data and wrote the manuscript with M.K.M. O.S. was involved with project design. A.B-N. and I.O. assisted with organization and design of the project and provided local support. J.S. assisted with analyzing the data, performed the geospatial analysis, and created the maps. A.K. was the lead research assistant and helped to coordinate local data collection efforts. R.R.P. and E.K.S. designed, organized, and oversaw the entirety of the project and are senior investigators.

### Acknowledgements

We would like to acknowledge Dr. Florence Dedey and Dr. Grace Ayensu-Danquah for their support throughout this project.

### Figure Legends

**Table 1** Hospital Stratification. Detailed list of services required to be categorized under each hospital level. A hospital must have ALL listed services to be categorized under a specific level. These services must be available >80% of the time throughout the year unless otherwise specified. Level 6 represents a hospital with the fewest breast cancer services.

\*"Sometimes available" includes hospitals that reported offering a service, but it is only available <80% of the time throughout the year.

**Table 2** Number of hospitals in each stratification before and after hypothetical targeted resource allocation. The hypothetical targeted resource allocation included the following two conditions: 1) All hospitals were modeled to provide CBE. Under this assumption all hospitals are at least Level 6. 2) Hospitals that were missing only a single service in order to increase their level within the stratification system were modeled as if they provided that service.

**Figure 1** Map depicting the stratification level and location of hospitals in the Eastern Region of Ghana. Black lines depict borders for districts within the Eastern Region.

**Figure 2** Proximity maps depicting the stratification level and location of hospitals in the Eastern Region of Ghana. Each concentric circle depicts a 5km distance from the corresponding hospital. A) Hospitals providing screening services (Levels 1-6). B) Hospitals providing diagnostic services (Levels 1-5). C) Hospitals providing surgical management (Levels 1-4).

**Figure 3** Proximity maps depicting the stratification level and location of hospitals in the Eastern Region of Ghana after hypothetical targeted resource allocation. Each concentric circle depicts a 5km distance from the corresponding hospital. A) Hospitals hypothetically providing screening services (Levels 1-6). B) Hospitals hypothetically providing diagnostic services (Levels 1-5). C) Hospitals hypothetically providing surgical management (Levels 1-4).

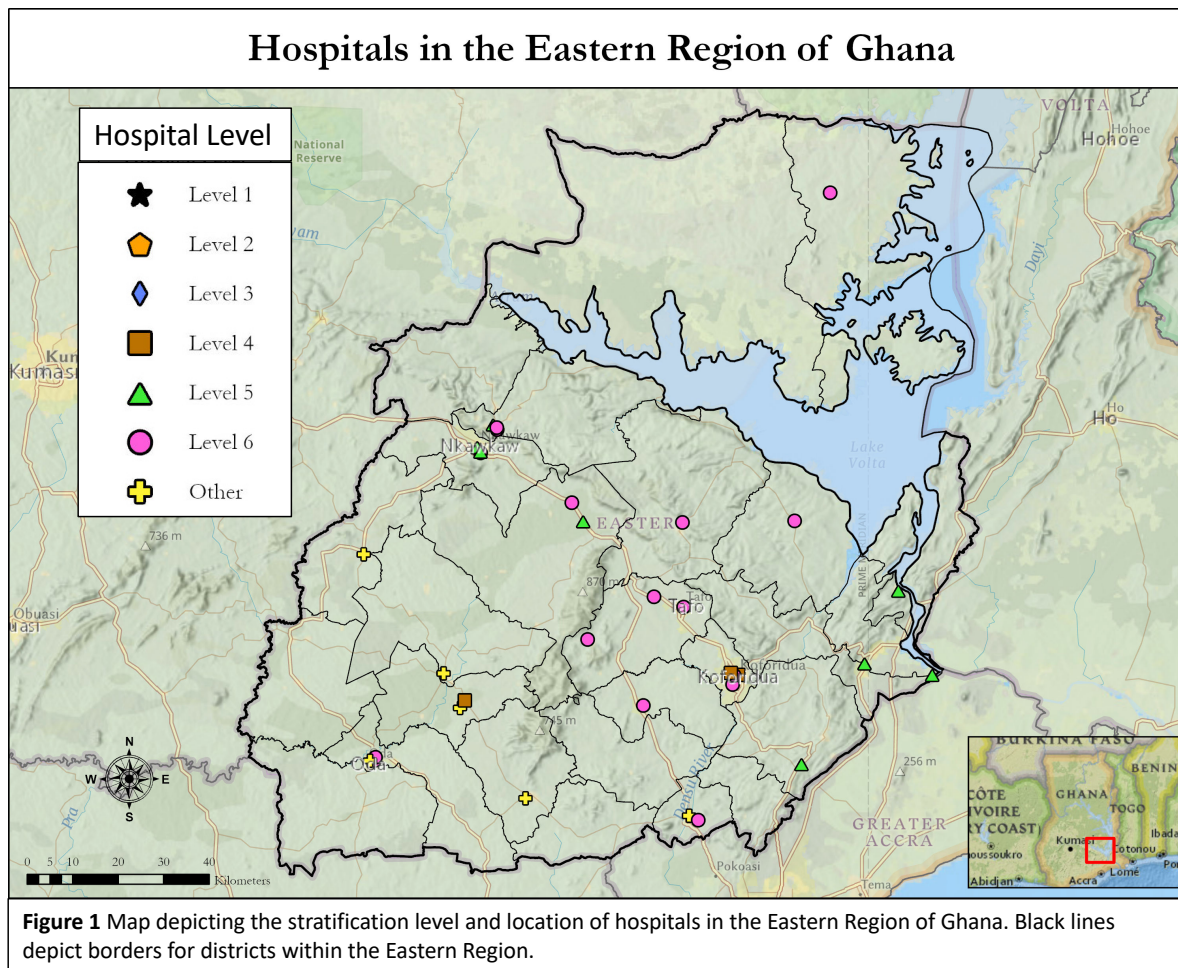

1  
2  
3  
4  
5  
6  
7  
8  
9  
10  
11  
12  
13  
14  
15  
16  
17  
18  
19  
20  
21  
22  
23  
24  
25  
26  
27  
28  
29  
30  
31  
32  
33  
34  
35  
36  
37  
38  
39  
40  
41  
42  
43  
44  
45  
46  
47

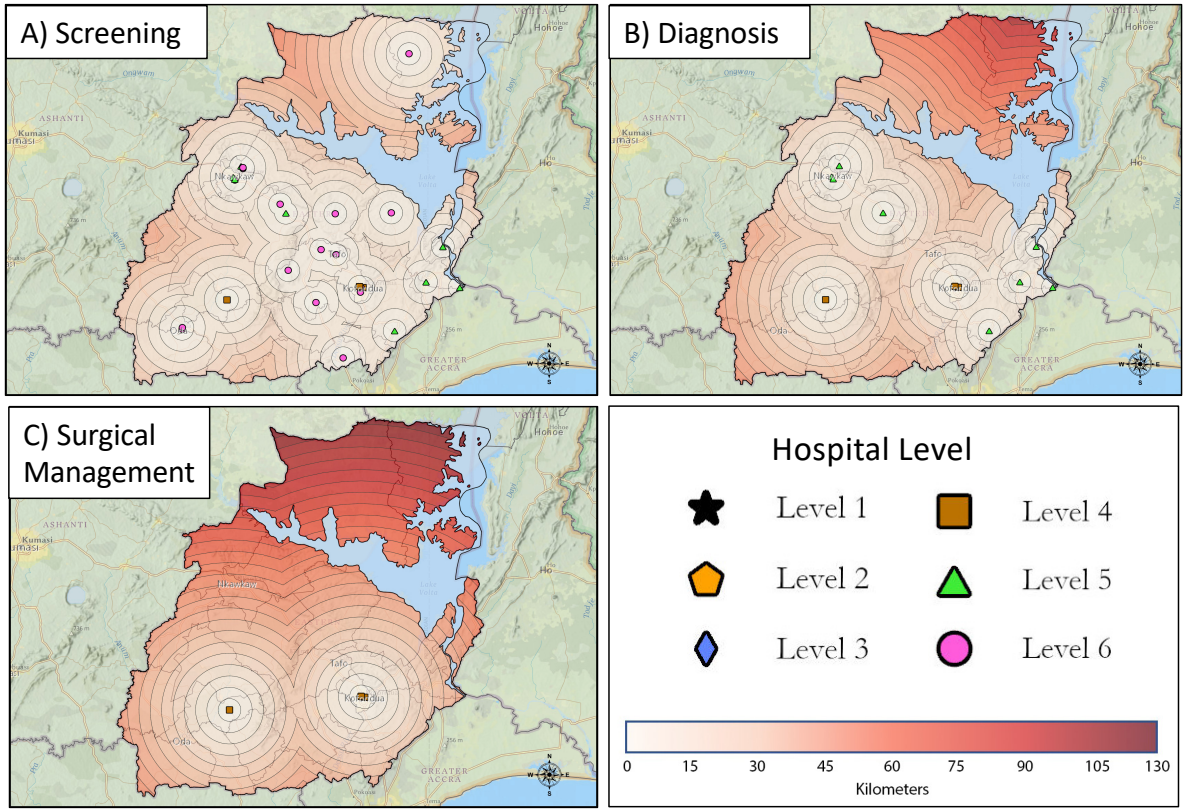

**Figure 2** Proximity maps depicting the stratification level and location of hospitals in the Eastern Region of Ghana. Each concentric circle depicts a 5km distance from the corresponding hospital. A) Hospitals providing screening services (Levels 1-6). B) Hospitals providing diagnostic services (Levels 1-5). C) Hospitals providing surgical management (Levels 1-4).



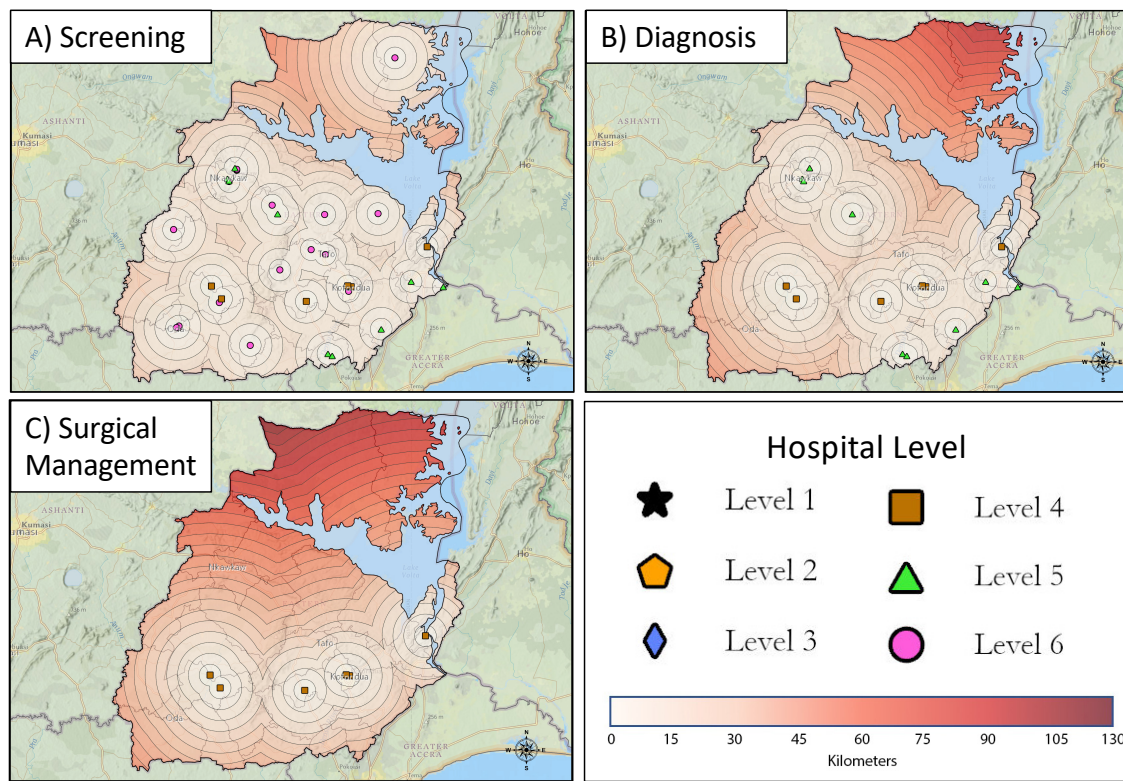

**Figure 3** Proximity maps depicting the stratification level and location of hospitals in the Eastern Region of Ghana after hypothetical targeted resource allocation. Each concentric circle depicts a 5km distance from the corresponding hospital. A) Hospitals hypothetically providing screening services (Levels 1-6). B) Hospitals hypothetically providing diagnostic services (Levels 1-5). C) Hospitals hypothetically providing surgical management (Levels 1-4).

## Breast PIPES Data Entry

|                                                                                                                                                                                                                                                                                                                                                                                                                                                                                                                                                                             |                                                                                                                                                                                                                                                                       |                                                                                                                                                                                                                                                                                                                                                                                                                                                                                                                                                                                                                      |                                                                                                                                                                                                                                   |
|-----------------------------------------------------------------------------------------------------------------------------------------------------------------------------------------------------------------------------------------------------------------------------------------------------------------------------------------------------------------------------------------------------------------------------------------------------------------------------------------------------------------------------------------------------------------------------|-----------------------------------------------------------------------------------------------------------------------------------------------------------------------------------------------------------------------------------------------------------------------|----------------------------------------------------------------------------------------------------------------------------------------------------------------------------------------------------------------------------------------------------------------------------------------------------------------------------------------------------------------------------------------------------------------------------------------------------------------------------------------------------------------------------------------------------------------------------------------------------------------------|-----------------------------------------------------------------------------------------------------------------------------------------------------------------------------------------------------------------------------------|
| <p><b>Section A – 1: Basic Information</b></p> <ol style="list-style-type: none"> <li>Region:</li> <li>District:</li> <li>Date:</li> <li>Name:</li> <li>Respondent Phone:</li> <li>Title:</li> <li>Facility:</li> <li>Address:</li> <li>GPS Lat: _____ Long: _____</li> <li>Facility Phone:</li> <li>Facility Email:</li> <li>RA:</li> <li>RA Phone:</li> </ol>                                                                                                                                                                                                             | <p><b>Section B – 1: Onsite Imaging</b></p> <p>All [Y/N] + Availability [1/0]<br/>Example: Y/1, Y/0 or N</p> <ol style="list-style-type: none"> <li>CBE</li> <li>Mammogram</li> <li>US</li> <li>XR</li> <li>MRI</li> <li>CT</li> <li>PET</li> <li>Genetics</li> </ol> | <p><b>B – 1</b></p> <ol style="list-style-type: none"> <li>_____</li> <li>_____</li> <li>_____</li> <li>_____</li> <li>_____</li> <li>_____</li> <li>_____</li> <li>_____</li> </ol>                                                                                                                                                                                                                                                                                                                                                                                                                                 |                                                                                                                                                                                                                                   |
| <p><b>Section A – 2: Facility Information</b></p> <ol style="list-style-type: none"> <li>Facility Type (1-6):           <ol style="list-style-type: none"> <li>Teaching</li> <li>Regional</li> <li>Metropolitan</li> <li>Municipal</li> <li>District</li> <li>Hospital</li> </ol> </li> <li>Facility Ownership (1-5):           <ol style="list-style-type: none"> <li>Government</li> <li>Quasi government</li> <li>Private</li> <li>CAHG</li> <li>Other faith based, <i>indicate</i></li> </ol> </li> <li>Breast clinic [Y/N]:</li> <li>Cervical clinic [Y/N]:</li> </ol> | <p><b>A – 2</b></p> <ol style="list-style-type: none"> <li>_____</li> <li>_____</li> <li>_____</li> <li>_____</li> </ol>                                                                                                                                              | <p><b>Section B – 2: Mammogram Sub Survey</b></p> <ol style="list-style-type: none"> <li>Keep records [Y/N]:</li> <li>Number records (1-4):</li> <li>Free to patient (Y/N):</li> <li>If no, cost<br/>(1=&lt;100 2=100-500 3=&gt;500):</li> <li>Insurance covered (Y/N)</li> <li>Which (1=NHIS or 2=Private, list):</li> <li>100% by NHIS (Y/N)</li> <li>Who interprets<br/>(1=Outside facility 2 = in house non rad 3 = in house cons rad 4 = in house spec rads 5 = other, list):</li> <li>External review? (1 = Ghana 2 = Outside GH):</li> <li>External facility name:</li> <li>Time for results (1-3)</li> </ol> | <p><b>B – 2</b></p> <ol style="list-style-type: none"> <li>_____</li> </ol> |
| <p><b>Section A – 3: Personnel Number</b></p> <p>If none, indicate with "0".</p> <ol style="list-style-type: none"> <li>MD surgeon: _____</li> <li>MD Ob/Gyn: _____</li> <li>MD Gyn/Onc: _____</li> <li>MD plastic surgeon: _____</li> <li>Radiologist: ___T ___S ___C</li> <li>Pathologist: ___T ___S ___C</li> <li>Oncologist: ___S ___C</li> <li>Rad Onc: ___S ___C</li> <li>Physician Assistant: _____</li> <li>Social worker: _____</li> </ol>                                                                                                                         | <p><b>Section B – 3: Pap and HPV</b></p> <p>All [Y/N] + Availability [1/0]<br/>Ex: Y/1, Y/0 or N</p> <ol style="list-style-type: none"> <li>Pap</li> <li>HPV</li> <li>HPV 16/18</li> <li>HPV (1=provider 2=patient)</li> <li>HPV vaccine</li> </ol>                   | <p><b>B – 3</b></p> <ol style="list-style-type: none"> <li>_____</li> <li>_____</li> <li>_____</li> <li>_____</li> <li>_____</li> </ol>                                                                                                                                                                                                                                                                                                                                                                                                                                                                              |                                                                                                                                                                                                                                   |

|                                                                                                                                                                                                                                                                                                                                                                                                                                                                                                                     |                                                                                                                                                                                                                                                                      |                                                                                                                                                                                                                                                                                              |                                                                                                                                                                                                                                                                                                                                                                                                                                                                                                                                                   |
|---------------------------------------------------------------------------------------------------------------------------------------------------------------------------------------------------------------------------------------------------------------------------------------------------------------------------------------------------------------------------------------------------------------------------------------------------------------------------------------------------------------------|----------------------------------------------------------------------------------------------------------------------------------------------------------------------------------------------------------------------------------------------------------------------|----------------------------------------------------------------------------------------------------------------------------------------------------------------------------------------------------------------------------------------------------------------------------------------------|---------------------------------------------------------------------------------------------------------------------------------------------------------------------------------------------------------------------------------------------------------------------------------------------------------------------------------------------------------------------------------------------------------------------------------------------------------------------------------------------------------------------------------------------------|
| <p><b>C – 1: Breast Procedures</b></p> <ol style="list-style-type: none"> <li>1. Biopsy FNA [Y1, Y0 or N]</li> <li>2. Biopsy Core Needle [Y1, Y0 or N]</li> <li>3. Excisional Bx [Y1, Y0 or N]</li> <li>4. In house review [Y1, Y0 or N]</li> <li>5. External review [Y1, Y0 or N]</li> <li>6. If ext, name and country:</li> <li>7. Result time (1-3)</li> <li>8. Stain for immuno [Y1, Y0 or N]</li> <li>9. ER stain [Y1, Y0 or N]</li> <li>10. PR stain [Y1, Y0 or N]</li> <li>11. HER2 [Y1, Y0 or N]</li> </ol> | <p><b>C – 1</b></p> <ol style="list-style-type: none"> <li>1. _____</li> <li>2. _____</li> <li>3. _____</li> <li>4. _____</li> <li>5. _____</li> <li>6. _____</li> <li>7. _____</li> <li>8. _____</li> <li>9. _____</li> <li>10. _____</li> <li>11. _____</li> </ol> | <p><b>D – 1: Chemotherapy</b></p> <ol style="list-style-type: none"> <li>1. Chemo [Y1, Y0 or N]</li> <li>2. 1=For Breast, 2=Cervical, 3=Both</li> <li>3. Which agents (1-10)</li> <li>4. Combinations used:</li> <li>5. Endocrine [Y1, Y0 or N]</li> <li>6. Which agents? (1 – 7)</li> </ol> | <p><b>D – 1</b></p> <ol style="list-style-type: none"> <li>1. _____</li> <li>2. _____</li> <li>3. _____</li> <li>4. write _____</li> <li>5. _____</li> <li>6. _____</li> </ol>                                                                                                                                                                                                                                                                                                                                                                    |
| <p><b>C – 2: Staging</b></p> <ol style="list-style-type: none"> <li>1. Staging [Y1, Y0 or N]</li> <li>2. If yes, how? (1 = CE only, 2 = CE + imaging)</li> <li>4. Imaging for staging (1-5, list all) (1=XR 2=CT 3=US 4=MRI 5=PET)</li> <li>5. Pathological staging? [Y1, Y0 or N]</li> </ol>                                                                                                                                                                                                                       | <p><b>C – 2</b></p> <ol style="list-style-type: none"> <li>1. _____</li> <li>2. _____</li> <li>3. _____</li> <li>4. _____</li> <li>5. _____</li> </ol>                                                                                                               | <p><b>D – 2: Radiation</b></p> <ol style="list-style-type: none"> <li>1. Offer radiation? [Y1, Y0 or N]</li> <li>2. If no, refer? [Y/N]</li> <li>3. Where?</li> <li>4. Type of radiation? (1=external beam 2=brachy 3=other, write)</li> </ol>                                               | <p><b>D – 2</b></p> <ol style="list-style-type: none"> <li>1. _____</li> <li>2. _____</li> <li>3. _____</li> <li>4. _____</li> </ol>                                                                                                                                                                                                                                                                                                                                                                                                              |
| <p><b>C – 3: Breast Surgery</b></p> <ol style="list-style-type: none"> <li>1. Breast surgery [Y1, Y0 or N]</li> <li>2a.WLE/Lump [Y1, Y0 or N]</li> <li>2b.Mastectomy [Y1, Y0 or N]</li> <li>2c.Ax Surg [Y1, Y0 or N]</li> <li>3.If yes Ax, SLN map? [Y1, Y0 or N]</li> <li>3a.Dye</li> <li>3b.Radio</li> <li>4.Reconstruction? [Y1, Y0 or N]</li> <li>5.Which (1=expander/implant 2=rotation flap 3=free flap)</li> </ol>                                                                                           | <p><b>C – 3</b></p> <ol style="list-style-type: none"> <li>1. _____</li> <li>2a. _____</li> <li>2b. _____</li> <li>2c. _____</li> <li>3. _____</li> <li>3a. _____</li> <li>3b. _____</li> <li>4. _____</li> <li>5. _____</li> </ol>                                  | <p><b>D – 3: Follow Up</b></p> <ol style="list-style-type: none"> <li>1. Long term F/U (Y/N)</li> <li>2. How F/U (1-4) 1=phone 2=home 3=clinic 4=other</li> <li>3. Registry</li> <li>4. Cancer outreach</li> <li>5. Counseling</li> <li>6. Palliative care?</li> </ol>                       | <p><b>D – 3</b></p> <ol style="list-style-type: none"> <li>1. _____</li> <li>2. _____</li> <li>3. _____</li> <li>4. _____</li> <li>5. _____</li> <li>6. _____</li> </ol>                                                                                                                                                                                                                                                                                                                                                                          |
| <p><b>C – 4: Cervical Procedures</b></p> <ol style="list-style-type: none"> <li>1. Gynecologic surgery [Y1, Y0 or N]</li> <li>2. Which (1=simple hyst 2 = rad hyst 3 = trachelectomy)</li> <li>3. For cervical cancer? Y/N</li> <li>4. VIA</li> <li>5. VILI</li> <li>6. Colp:</li> <li>7. Cryo:</li> <li>8. Cervical bx:</li> <li>9. LEEP:</li> <li>10. Cold knife cone:</li> <li>11. Other</li> </ol>                                                                                                              | <p><b>C – 4</b></p> <ol style="list-style-type: none"> <li>1. _____</li> <li>2. _____</li> <li>3. _____</li> <li>4. _____</li> <li>5. _____</li> <li>6. _____</li> <li>7. _____</li> <li>8. _____</li> <li>9. _____</li> <li>10. _____</li> <li>11. _____</li> </ol> | <p><b>Notes</b></p>                                                                                                                                                                                                                                                                          | <p>Chemo Numbers</p> <ol style="list-style-type: none"> <li>1. Cyclophosphamide</li> <li>2. Doxorubicin (Adriamycin)</li> <li>3. 5 FU</li> <li>4. Methotrexate</li> <li>5. Epirubicin</li> <li>6. Doxetaxel</li> <li>7. Paclitaxel</li> <li>8. Carboplatin</li> <li>9. Cisplatin</li> <li>10. Others, list</li> </ol> <p>Endocrine Numbers</p> <ol style="list-style-type: none"> <li>1. Tamoxifen</li> <li>2. Anastrozole</li> <li>3. Esemestane</li> <li>4. Fulvestrant</li> <li>5. Goserlin</li> <li>6. Letrozole</li> <li>7. Other</li> </ol> |

## Breast and Cervical PIPES (BCP) Question Guide and Data Dictionary

Yes/No answers should be recorded as Y or N

Available/Not Always Available should be indicated by 1 (Available) or 0 (Not always available) after the Y or N.

For example, a mammogram that exists but is not always available should be indicated as Y/0.

If there is no mammogram at all, it should be indicated as N.

### Section A – 1: Contact information.

1. Region name
2. District Name
3. Date
4. Respondent Name
5. Respondent Phone
6. His/Her Title
7. Name of Facility
8. Facility Address
9. GPS coordinates
10. Facility Phone
11. Research Assistant Name
12. RA Phone.

### Section A – 2 Facility Information

1. Facility Type, write number.
  - a. 1 = Teaching
  - b. 2 = Regional
  - c. 3 = Metropolitan
  - d. 4 = Municipal
  - e. 5 = District
  - f. 6 = Hospital
2. Facility Ownership, write number.
  - a. 1 = Government
  - b. 2 = Quasi government
  - c. 3 = Private
  - d. 4 = CAHG
  - e. 5 = Other faith based, *indicate*
3. Breast clinic: Does your facility have a breast clinic? Indicate with Y/N
4. Cervical clinic: Does your facility have cervical clinic? Y/N

### Section A – 3: Personnel

For this section indicate the number of personnel as asked. For some specialties, note the number of technicians (T), specialists (S), and consultants (C).

### Section B – 1: Imaging Capacity

Ask if they have the listed diagnostic modalities by indicating Y/N, followed by nearly always available (1) or not always available (0).

Example 1: MRI always available = Y-1.

Example 2: XRay not always available = Y-0

Example 3: No CT scan = N

### Section B – 2 Mammogram Sub Survey

1. Do they keep records? Y/N
2. Number of mammograms per month that the facility performs
  - a. 1 = 1-10
  - b. 2 = 11-30
  - c. 3 = 31-100
  - d. 4 = >100
3. Free? Y/N
4. If no, how much does it cost?

- a. 1 = <100 GHC
- b. 2 = 100-500 GHC
- c. 3 = >500 GHC
5. 100% insurance covered? Y/N
6. Which insurance? 1 = NHIS 2 = Private, write
7. Do you conduct in house read of mammogram? Y/N
8. Who interprets mammograms? List all applicable
  - a. 1=Outside facility
  - b. 2=In house non radiologist (such as the surgeon)
  - c. 3=In house consultant radiologist
  - d. 4=In house specialist radiologist
  - e. 5=Other, please list.
9. If interpretation is at an external facility, indicate 1 or 2.
  - a. 1=Within Ghana
  - b. 2=Outside of Ghana
10. If outside of Ghana, write the name of the facility and the name of the country.
11. How long does it take for the patient to receive their results?
  - a. 1=<2 weeks
  - b. 2=2 weeks-1 month
  - c. 3=>1month

### Section B – 3 PAP and HPV

Yes/No answers should be recorded as Y or N

Available/Not Always Available should be indicated by 1 (Available) or 0 (Not always available) after the Y or N.

For example, Pap smear that exists but is not always available should be indicated as Y/0.

If there is no Pap smear at all, it should be indicated as N.

1. Does the facility offer Pap smears
2. HPV testing
3. Do the facility test for 16/18 specifically
4. Offer HPV vaccine
5. Who performs the HPV swab?
  - a. 1=Provider performed
  - b. 2=Patient performed

### Section C – 1 Breast Diagnostic Procedures

Yes/No answers should be recorded as Y or N

Available/Not Always Available should be indicated by 1 (Available) or 0 (Not always available) after the Y or N.

For example, FNA that exists but is not always available should be indicated as Y/0.

If there is no FNA at all, it should be indicated as N.

Does your facility perform the following:

1. Biopsy FNA
2. Biopsy core needle
3. Excisional biopsy
4. In house review of pathology results?
5. External review of pathology results?
6. If external, write the name and country.
7. How long does it take the patient to receive the results of the pathology report? Indicate using 1,2 or 3.



- a. 1=<1 month
- b. 2=1-2 months
- c. 3=>2 months
8. Does your facility stain for immunohistochemistry?
9. If yes, does it stain for Estrogen Receptor (ER) and is it always available?
10. Progesterone Receptor (PR) and always available?
11. HER2 neu and always available?

### Section C – 2 Staging

1. Does your facility perform staging for breast and cervical cancer? Y/N
2. If yes, how is it performed
  - a. 1=With clinical exam (CE) only?
  - b. 2=Imaging + CE?
  - c. 3=Pathological staging?
3. If imaging is used, indicate which modalities (can list more than 1).
  - a. 1=XR
  - b. 2=CT
  - c. 3=US
  - d. 4=MRI
  - e. 5=PET

### Section C – 3 Breast Surgery

1. Does your center perform surgery for breast cancer? Indicate Y/N and if always available (1/0).
2. If yes do you offer the following? Y/N and note the availability (1/0)
  - a. 1=Wide Local Excision (WLE)/Lumpectomy
  - b. 2=Mastectomy
  - c. 3=Axillary surgery
3. If yes to axillary surgery, does your center perform sentinel lymph node mapping?
  - a. 1=with dye (such as isosulphan blue or Patent blue V [PBV])
  - b. 2=with radioactive isotope
4. Does your center offer reconstructive surgery for breast cancer? Y/N + 1/0
5. If yes, list which methods (list all applicable).
  - a. 1=Tissue Expander
  - b. 2=Rotational flap
  - c. 3=Free flap

### Section C – 4 Cervical Surgery and Procedures

Indicate Y/N and if always available (1/0)

1. Does your center offer surgery for cervical cancer?
2. If yes, what kind of surgery/
  - a. 1=Simple hysterectomy
  - b. 2=Radical hysterectomy
  - c. 3=Trachelectomy
3. Does your center offer Visual Inspection with Acetic Acid (VIA)?
4. Visual Inspection with Lugol's Iodine VILI?
5. Colposcopy?
6. Cryotherapy?
7. Cervical biopsy?

8. LEEP?
9. Cold Knife Cone?
10. Other, write.

#### Section D -1 Chemotherapy and Endocrine Therapy

1. Does your center offer chemotherapy? Y/N + 1/0
2. If yes, does it offer it for the following? Number plus availability using 1/0.
  - a. 1=Breast cancer only
  - b. 2=Cervical cancer
  - c. 3=Both breast cancer and cervical cancer
3. Which agents do you have? List all applicable
  - a. 1=Cyclophosphamide
  - b. 2=Doxorubicin (Adriamycin)
  - c. 3=5FU
  - d. 4=Methotrexate
  - e. 5=Epirubicin
  - f. 6=Docetaxel
  - g. 7=Paclitaxel
  - h. 8=Carboplatin
  - i. 9=Cisplatin
  - j. 10=Other, please specify
4. What combinations does your center use (such as CAF). Please write.
5. Does your center use endocrine therapy? Y/N + 1/0
6. If yes, which agents? List all applicable.
  - a. 1=Tamoxifen
  - b. 2=Anastrozole
  - c. 3=Esemestane
  - d. 4=Fulvestrant
  - e. 5=Goserelin
  - f. 6=Letrozole
  - g. 7=Other

#### Section D – 2 Radiation Therapy

1. Does your center offer radiation? Indicate with Y/N and availability with 1/0.
2. If yes what kind(s)?
  - a. 1=External beam
  - b. 2=Brachytherapy
  - c. 3=Other, list

#### Section D – 3 Follow Up

1. Does your center offer follow up with patients?
2. How do you conduct follow up?
  - a. 1 = Phone
  - b. 2 = Home visit
  - c. 3 = Clinical visit
  - d. 4 = Other, write
3. Does your facility maintain a cancer registry?
4. Does your facility perform cancer outreach?
5. Does your facility provide counseling?
6. Does your facility offer palliative care services?

1  
2  
3  
4  
5  
6  
7  
8  
9  
10  
11  
12  
13  
14  
15  
16  
17  
18  
19  
20  
21  
22  
23  
24  
25  
26  
27  
28  
29  
30  
31  
32  
33  
34  
35  
36  
37  
38  
39  
40  
41  
42  
43  
44  
45  
46  
47  
48  
49  
50  
51  
52  
53  
54  
55  
56  
57  
58  
59  
60STROBE Statement—Checklist of items that should be included in reports of *cross-sectional studies*

|                              | <b>Item No</b> | <b>Recommendation</b>                                                                                                                                                                                                                                                                                                                                                                                         |
|------------------------------|----------------|---------------------------------------------------------------------------------------------------------------------------------------------------------------------------------------------------------------------------------------------------------------------------------------------------------------------------------------------------------------------------------------------------------------|
| <b>Title and abstract</b>    | 1              | (a) Indicate the study's design with a commonly used term in the title or the abstract<br>(b) Provide in the abstract an informative and balanced summary of what was done and what was found                                                                                                                                                                                                                 |
| <b>Introduction</b>          |                |                                                                                                                                                                                                                                                                                                                                                                                                               |
| Background/rationale         | 2              | Explain the scientific background and rationale for the investigation being reported                                                                                                                                                                                                                                                                                                                          |
| Objectives                   | 3              | State specific objectives, including any prespecified hypotheses                                                                                                                                                                                                                                                                                                                                              |
| <b>Methods</b>               |                |                                                                                                                                                                                                                                                                                                                                                                                                               |
| Study design                 | 4              | Present key elements of study design early in the paper                                                                                                                                                                                                                                                                                                                                                       |
| Setting                      | 5              | Describe the setting, locations, and relevant dates, including periods of recruitment, exposure, follow-up, and data collection                                                                                                                                                                                                                                                                               |
| Participants                 | 6              | (a) Give the eligibility criteria, and the sources and methods of selection of participants                                                                                                                                                                                                                                                                                                                   |
| Variables                    | 7              | Clearly define all outcomes, exposures, predictors, potential confounders, and effect modifiers. Give diagnostic criteria, if applicable                                                                                                                                                                                                                                                                      |
| Data sources/<br>measurement | 8*             | For each variable of interest, give sources of data and details of methods of assessment (measurement). Describe comparability of assessment methods if there is more than one group                                                                                                                                                                                                                          |
| Bias                         | 9              | Describe any efforts to address potential sources of bias                                                                                                                                                                                                                                                                                                                                                     |
| Study size                   | 10             | Explain how the study size was arrived at                                                                                                                                                                                                                                                                                                                                                                     |
| Quantitative variables       | 11             | Explain how quantitative variables were handled in the analyses. If applicable, describe which groupings were chosen and why                                                                                                                                                                                                                                                                                  |
| Statistical methods          | 12             | (a) Describe all statistical methods, including those used to control for confounding<br>(b) Describe any methods used to examine subgroups and interactions<br>(c) Explain how missing data were addressed<br>(d) If applicable, describe analytical methods taking account of sampling strategy<br>(e) Describe any sensitivity analyses                                                                    |
| <b>Results</b>               |                |                                                                                                                                                                                                                                                                                                                                                                                                               |
| Participants                 | 13*            | (a) Report numbers of individuals at each stage of study—eg numbers potentially eligible, examined for eligibility, confirmed eligible, included in the study, completing follow-up, and analysed<br>(b) Give reasons for non-participation at each stage<br>(c) Consider use of a flow diagram                                                                                                               |
| Descriptive data             | 14*            | (a) Give characteristics of study participants (eg demographic, clinical, social) and information on exposures and potential confounders<br>(b) Indicate number of participants with missing data for each variable of interest                                                                                                                                                                               |
| Outcome data                 | 15*            | Report numbers of outcome events or summary measures                                                                                                                                                                                                                                                                                                                                                          |
| Main results                 | 16             | (a) Give unadjusted estimates and, if applicable, confounder-adjusted estimates and their precision (eg, 95% confidence interval). Make clear which confounders were adjusted for and why they were included<br>(b) Report category boundaries when continuous variables were categorized<br>(c) If relevant, consider translating estimates of relative risk into absolute risk for a meaningful time period |
| Other analyses               | 17             | Report other analyses done—eg analyses of subgroups and interactions, and sensitivity analyses                                                                                                                                                                                                                                                                                                                |

| <b>Discussion</b>        |    |                                                                                                                                                                            |
|--------------------------|----|----------------------------------------------------------------------------------------------------------------------------------------------------------------------------|
| Key results              | 18 | Summarise key results with reference to study objectives                                                                                                                   |
| Limitations              | 19 | Discuss limitations of the study, taking into account sources of potential bias or imprecision. Discuss both direction and magnitude of any potential bias                 |
| Interpretation           | 20 | Give a cautious overall interpretation of results considering objectives, limitations, multiplicity of analyses, results from similar studies, and other relevant evidence |
| Generalisability         | 21 | Discuss the generalisability (external validity) of the study results                                                                                                      |
| <b>Other information</b> |    |                                                                                                                                                                            |
| Funding                  | 22 | Give the source of funding and the role of the funders for the present study and, if applicable, for the original study on which the present article is based              |

\*Give information separately for exposed and unexposed groups.

**Note:** An Explanation and Elaboration article discusses each checklist item and gives methodological background and published examples of transparent reporting. The STROBE checklist is best used in conjunction with this article (freely available on the Web sites of PLoS Medicine at <http://www.plosmedicine.org/>, Annals of Internal Medicine at <http://www.annals.org/>, and Epidemiology at <http://www.epidem.com/>). Information on the STROBE Initiative is available at [www.strobe-statement.org](http://www.strobe-statement.org).

# BMJ Open

## Surveying and Mapping Breast Cancer Services in Ghana: A Cross-Sectional Pilot Study in the Eastern Region

|                                 |                                                                                                                                                                                                                                                                                                                                                                                                                                                                                                                                                                                                                                                                                                                                                                                                                                                                                                                                                                                                                                                                                                                                                                                                                                                                                                                                                       |
|---------------------------------|-------------------------------------------------------------------------------------------------------------------------------------------------------------------------------------------------------------------------------------------------------------------------------------------------------------------------------------------------------------------------------------------------------------------------------------------------------------------------------------------------------------------------------------------------------------------------------------------------------------------------------------------------------------------------------------------------------------------------------------------------------------------------------------------------------------------------------------------------------------------------------------------------------------------------------------------------------------------------------------------------------------------------------------------------------------------------------------------------------------------------------------------------------------------------------------------------------------------------------------------------------------------------------------------------------------------------------------------------------|
| Journal:                        | <i>BMJ Open</i>                                                                                                                                                                                                                                                                                                                                                                                                                                                                                                                                                                                                                                                                                                                                                                                                                                                                                                                                                                                                                                                                                                                                                                                                                                                                                                                                       |
| Manuscript ID                   | bmjopen-2021-051122.R1                                                                                                                                                                                                                                                                                                                                                                                                                                                                                                                                                                                                                                                                                                                                                                                                                                                                                                                                                                                                                                                                                                                                                                                                                                                                                                                                |
| Article Type:                   | Original research                                                                                                                                                                                                                                                                                                                                                                                                                                                                                                                                                                                                                                                                                                                                                                                                                                                                                                                                                                                                                                                                                                                                                                                                                                                                                                                                     |
| Date Submitted by the Author:   | 13-Sep-2021                                                                                                                                                                                                                                                                                                                                                                                                                                                                                                                                                                                                                                                                                                                                                                                                                                                                                                                                                                                                                                                                                                                                                                                                                                                                                                                                           |
| Complete List of Authors:       | Moustafa, Moustafa; University of Utah Health, Center for Global Surgery<br>Mali, Meghan; University of Utah Health, Center for Global Surgery;<br>University of Utah Hospital, General Surgery<br>Lopez-Verdugo, Fidel; University of Utah Health, Center for Global Surgery<br>Sanyang, Ousman; University of Utah Health, Center for Global Surgery;<br>Edward Francis Small Teaching Hospital<br>Nellermoe, Jonathan; University of Utah Health, Center for Global Surgery<br>Price , Raymond ; University of Utah Health, Center for Global Surgery;<br>Intermountain Medical Center, General Surgery<br>Manortey, Stephen; Ensign College of Public Health<br>Biritwum-Nyarko, Alberta; Ghana Health Service, Eastern Regional Health Directorate<br>Ofei, Irina; Ghana Health Service, Eastern Regional Health Directorate<br>Sorensen, Justin; University of Utah, J. Willard Marriott Library<br>Goldsmith, Alison; University of Utah Health, Center for Global Surgery;<br>University of Utah Health, Obstetrics and Gynecology<br>Brownson, Kirstyn; University of Utah Health, Center for Global Surgery;<br>Huntsman Cancer Institute Cancer Hospital<br>Kumah, Augustine; Nyaho Medical Centre, Quality and Public Health<br>Sutherland, Edward; University of Utah Health, Center for Global Surgery; Ensign College of Public Health |
| <b>Primary Subject Heading</b>: | Oncology                                                                                                                                                                                                                                                                                                                                                                                                                                                                                                                                                                                                                                                                                                                                                                                                                                                                                                                                                                                                                                                                                                                                                                                                                                                                                                                                              |
| Secondary Subject Heading:      | Global health, Health services research, Pathology, Radiology and imaging, Surgery                                                                                                                                                                                                                                                                                                                                                                                                                                                                                                                                                                                                                                                                                                                                                                                                                                                                                                                                                                                                                                                                                                                                                                                                                                                                    |
| Keywords:                       | Breast tumours < ONCOLOGY, Breast imaging < RADIOLOGY & IMAGING, Breast surgery < SURGERY, Organisation of health services < HEALTH SERVICES ADMINISTRATION & MANAGEMENT, Surgical pathology < PATHOLOGY                                                                                                                                                                                                                                                                                                                                                                                                                                                                                                                                                                                                                                                                                                                                                                                                                                                                                                                                                                                                                                                                                                                                              |
|                                 |                                                                                                                                                                                                                                                                                                                                                                                                                                                                                                                                                                                                                                                                                                                                                                                                                                                                                                                                                                                                                                                                                                                                                                                                                                                                                                                                                       |

1  
2  
3  
4  
5  
6  
7  
8  
9  
10  
11  
12  
13  
14  
15  
16  
17  
18  
19  
20  
21  
22  
23  
24  
25  
26  
27  
28  
29  
30  
31  
32  
33  
34  
35  
36  
37  
38  
39  
40  
41  
42  
43  
44  
45  
46  
47  
48  
49  
50  
51  
52  
53  
54  
55  
56  
57  
58  
59  
60

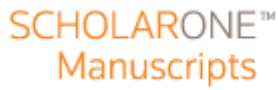



I, the Submitting Author has the right to grant and does grant on behalf of all authors of the Work (as defined in the below author licence), an exclusive licence and/or a non-exclusive licence for contributions from authors who are: i) UK Crown employees; ii) where BMJ has agreed a CC-BY licence shall apply, and/or iii) in accordance with the terms applicable for US Federal Government officers or employees acting as part of their official duties; on a worldwide, perpetual, irrevocable, royalty-free basis to BMJ Publishing Group Ltd ("BMJ") its licensees and where the relevant Journal is co-owned by BMJ to the co-owners of the Journal, to publish the Work in this journal and any other BMJ products and to exploit all rights, as set out in our [licence](#).

The Submitting Author accepts and understands that any supply made under these terms is made by BMJ to the Submitting Author unless you are acting as an employee on behalf of your employer or a postgraduate student of an affiliated institution which is paying any applicable article publishing charge ("APC") for Open Access articles. Where the Submitting Author wishes to make the Work available on an Open Access basis (and intends to pay the relevant APC), the terms of reuse of such Open Access shall be governed by a Creative Commons licence – details of these licences and which [Creative Commons](#) licence will apply to this Work are set out in our licence referred to above.

Other than as permitted in any relevant BMJ Author's Self Archiving Policies, I confirm this Work has not been accepted for publication elsewhere, is not being considered for publication elsewhere and does not duplicate material already published. I confirm all authors consent to publication of this Work and authorise the granting of this licence.

1  
2  
3  
4  
5  
6  
7  
8  
9  
10  
11 Surveying and Mapping Breast Cancer Services in Ghana: A Cross-Sectional Pilot Study in the Eastern  
12 Region  
13

14 Moustafa K. Moustafa<sup>1\*</sup>, Meghan E. Mali<sup>1,2\*</sup>, Fidel Lopez-Verdugo<sup>1\*</sup>, Ousman Sanyang<sup>1,3,4</sup>, Jonathan  
15 Nellerroe<sup>1</sup>, Raymond R Price<sup>1,2,5</sup>, Stephen Manortey<sup>6</sup>, Alberta Biritwum-Nyarko<sup>7</sup>, Irina Ofei<sup>7</sup>, Justin  
16 Sorensen<sup>8</sup>, Alison Goldsmith<sup>1,9</sup>, Kirstyn E. Brownson<sup>1,2,10</sup>, Augustine Kumah<sup>7,11</sup>, Edward K. Sutherland<sup>1,6</sup>  
17  
18  
19

20 Affiliations:

- 21 1 Center for Global Surgery, University of Utah School of Medicine, Salt Lake City, UT, USA  
22 2 Department of Surgery, University of Utah School of Medicine, Salt Lake City, UT, USA  
23 3 Edward Francis Small Teaching Hospital, Banjul, The Gambia  
24 4 School of Medicine and Allied Health Sciences, University of The Gambia, Banjul, The Gambia  
25 5 Department of Surgery, Intermountain Medical Center, Intermountain Healthcare  
26 6 Ensign College of Public Health, Kpong, Eastern Region, Ghana  
27 7 Ghana Health Service, Eastern Regional Health Directorate, Koforidua, Ghana  
28 8 J. Willard Marriott Library, University of Utah, Salt Lake City, UT, USA  
29 9 Department of Obstetrics and Gynecology, University of Utah School of Medicine, Salt Lake City,  
30 UT, USA  
31 10 Huntsman Cancer Institute, Salt Lake City, UT, USA  
32 11 Nyaho Medical Centre, Accra, Ghana  
33  
34  
35

36 \*Joint first authors  
37

38 **Corresponding Author**

39 Edward K. Sutherland, MD, MPH

40 Ensign College of Public Health, Kpong, Eastern Region, Ghana

41 Center for Global Surgery, University of Utah School of Medicine, Salt Lake City, UT, USA

42 Postal Address: P.O. Box AK 136, Akosombo, Eastern Region

43 Email: sutherlandmd@yahoo.com  
44  
45  
46  
47  
48  
49  
50  
51  
52  
53  
54  
55  
56  
57  
58  
59  
60



## ABSTRACT

### Objectives

Define the services available for the care of breast cancer at hospitals in the Eastern Region of Ghana, identify areas of the region with limited access to care through geospatial mapping, and test a novel survey instrument in anticipation of a nationwide scale up of the study.

### Design

A cross-sectional, facility-based survey study.

### Setting

This study was conducted at 33 of the 34 hospitals in the Eastern Region of Ghana from March 2020 to May 2020.

### Participants

The 33 hospitals surveyed represented 97% of all hospitals in the region. This included private, government, quasi-government, and faith-based organization owned hospitals.

### Results

Sixteen hospitals (82%) surveyed provided basic screening services, 11 (33%) provided pathologic diagnosis, and 3 (9%) provided those services in addition to basic surgical care. Fifty-three percent, 64%, and 78% of the population lived within 10 km, 25 km, and 45 km of screening, diagnostic, and treatment services respectively. Limited chemotherapy was available at 2 hospitals (6%), endocrine therapy at 1 hospital (3%), and radiotherapy was not available. Twenty-nine hospitals (88%) employed a general practitioner and 13 (39%) employed a surgeon. Oncology specialists, pathology personnel, and a plastic surgeon were only available in 1 hospital (3%) in the Eastern Region.

### Conclusions

Although 16 hospitals (82%) provided screening, only half the population lived within reasonable distance of these services. Few hospitals offered diagnosis and surgical services, but 64% and 78% of the population lived within a reasonable distance of these hospitals. Geospatial analysis suggested two priorities to cost-effectively expand breast cancer services: 1) increase the number of health facilities providing screening services and 2) centralize basic imaging, pathologic, and surgical services at targeted hospitals.

### Keywords

Breast tumours < ONCOLOGY

Breast imaging < RADIOLOGY & IMAGING

Breast surgery < SURGERY

Organisation of health services < HEALTH SERVICES ADMINISTRATION & MANAGEMENT

Surgical pathology < PATHOLOGY

### Strengths and limitations of this study

- This study accomplished a comprehensive assessment of breast cancer care available at 33 out of 34 hospitals in the Eastern Region of Ghana.
- Through geospatial analyses, areas of the region with limited access to services were identified and recommendations for expanding services with limited resources were able to be developed.
- Our study only evaluated geographic access to care and did not address other significant barriers in accessing care including transportation challenges, financial barriers, patient factors, facility capacity thresholds, and cultural factors.
- Only hospitals were surveyed for this study, so other health facilities that may provide some limited breast cancer screening or care services were not captured in this study.

### Funding Statement

This research received no specific grant from any funding agency in the public, commercial, or not-for-profit sectors. It was supported by the University of Utah Center for Global Surgery with no specific grant or award number.

### Competing Interests Statement

There are no conflicts of interest or competing interests to disclose. There are no financial relationships with any organizations that might have an interest in the submitted work in the previous three years and no other relationships or activities that could appear to have influenced the submitted work.

### Data Sharing Statement

Data detailing services available at diagnostic centers and non-governmental organization health facilities as well as information on cervical cancer services provided at the surveyed hospitals is available and was not included in this manuscript. For inquiries regarding the data please contact Dr. Edward Sutherland at sutherlandmd@yahoo.com. For inquiries regarding the survey tool and possible use in another country, please contact sutherlandmd@yahoo.com or rayrprice@comcast.net.

## Introduction

Breast cancer is the most common cancer and the leading cause of cancer-related death for women in Ghana, with 4,482 cases and 2,055 deaths attributed to breast cancer in 2020.[1] Incidence of breast cancer is lower in sub-Saharan Africa (SSA) compared to North America, but current estimates suggest the incidence is increasing.[2] Outcomes vary widely across the continent, but 5-year survival is estimated to be around 35% for women in western SSA compared to the greater than 80% 5-year survival seen in high-income countries.[3–5] Some early stage breast cancers may be treated with surgery alone, but advanced disease requires complex multidisciplinary care. Given that 77% of black women in SSA have advanced disease (stage III or IV) at presentation,[6] expanding services that allow for early diagnosis of breast cancer, improving access to basic diagnostic and surgical treatment, and developing sites with more comprehensive care should be prioritized. The Global Breast Cancer Initiative, launched by the World Health Organization (WHO) in 2021, acknowledges these priorities to improve equitable access to breast cancer care across the globe.[7]

Ghana is a lower-middle income country located in West Africa with 16 regions and a population of around 31 million.[8-10] The gross national income per capita is \$2,230 United States dollars, which ranks 147<sup>th</sup> out of 194 countries with data reported by The World Bank.[9,11] Around half of Ghanaians pay for their healthcare out of pocket despite the presence of the National Health Insurance Scheme, which only 38% of the population is enrolled in.[12,13] Management of breast cancer in Ghana is guided by The Ministry of Health's (MOH) "Standard Treatment Guidelines." These guidelines recommend clinical breast examination (CBE) every 3 years for women younger than 40 years old and annually after the age of 40. Mammography is also recommended every 2 years for women 40 years and older. The remainder of the guidelines are broad and emphasize the need for personalization of treatment based on patient and tumor factors. Surgery, chemotherapy, immunotherapy, radiotherapy, hormonal therapy, and palliative care are all listed as treatment options that should be considered.[14] There are no formal specifications detailing what different health facilities should provide in regards to breast cancer care, but the most comprehensive care is expected at tertiary teaching hospitals followed by regional hospitals, municipal hospitals, then district hospitals.[15]

In 2011, Ghana's MOH published the "National Strategy for Cancer Control in Ghana 2012-2016." This document outlines goals to improve early diagnosis of breast cancer through breast awareness, breast self-exam, and CBE. It also details targets for the expansion of cancer related equipment, infrastructure, and services at the various levels of health facilities across the country.[16] In this study, we aimed to delineate the current resources available for breast cancer care in the Eastern Region of Ghana and map these services to identify populations without geographic access to care. In addition, we aimed to test the survey instrument and administration process in anticipation of a nationwide scale up of this study. The MOH can use the information obtained from this project to evaluate progress towards the stated targets in their National Strategy and help direct resource implementation to improve access to care.

## Methods

### *Study Design and Setting*

A cross-sectional, facility-based survey was performed from March 2020 to May 2020 in Ghana's Eastern Region. This region was chosen for the pilot because the senior principal investigator (PI) for the project and our partners in the Ghana Health Service (GHS) live and work in the region. This provided our team with familiarity of the region and ensured the research assistants (RAs) would be geographically close to the senior PI if questions or concerns arose. The Eastern Region covers 8% of Ghana's landmass, is home to almost 3 million people, and is about 55% rural.[17]

### *Inclusion Criteria*

Targeted facilities included all hospitals in the region because hospitals are expected to provide the majority of care for breast cancer. Lists of hospitals in the region were obtained from databases of the Health Facilities Regulatory Agency (HeFRA) and from the GHS. A total of 34 hospitals were identified, and 33 agreed to participate.

### *Exclusion Criteria*

Health facilities that were not designated as hospitals by HeFRA and GHS were not included in this study. Health facilities not surveyed included: community-based health planning and services (CHPS facilities), health centers, clinics and polyclinics.

### *Survey Design*

The objective of the survey was to provide an assessment of a hospital's capacity to provide breast cancer care. The general framework for the survey was based on the WHO's Situational Analysis Tool for assessing emergency and essential surgical care and the Surgeons OverSeas (SOS) Personnel, Infrastructure, Procedure, Equipment, and Supplies (PIPES) tool for assessing surgical infrastructure.[18,19] Experts in breast cancer surgery, oncology, and global surgery reviewed the tool and made key modifications. The final version was developed through expert consensus and input from local and international partners. The data entry form used by RAs in the field and a guide with expanded information on each question is available in supplemental materials (please note the full survey also included assessment of cervical cancer services which is not reported in this article).

### *Survey Structure*

General information collected about each hospital included address, GPS coordinates, facility type, and ownership. Additional sections identifying the nature and quantity of personnel, imaging services, screening and diagnostic capacity, procedure and treatment options, surveillance, and follow up were also queried. Respondents were asked if a service is available at their facility (yes/no). "Yes" responses were specified as being always available (defined as greater than 80% of the time) or not always available. A sub-survey with additional questions about mammograms including number performed per month, patient cost, and who reviews the imaging was completed if a facility reported having a mammogram machine.

1  
2  
3 The personnel section surveyed how many healthcare providers involved with breast cancer care were  
4 employed at each hospital. Medical doctors (MDs) included general medical practitioners, general and  
5 plastic surgeons, obstetricians and gynecologists (ob/gyns) as well as radiology, pathology, oncology,  
6 and radiation oncology specialists and consultants. Ob/gyns were included in the survey because they  
7 often perform CBE. Non-MD trained providers included radiology and pathology technicians, physician  
8 assistants (PAs), and social workers. Social workers were included because they are often involved with  
9 palliative care and patient counseling.  
10  
11  
12

### 13 *Survey Administration*

14 Four RAs familiar with the local geography were recruited via The Ensign College of Public Health  
15 (ECOPH) in Kpong, Ghana, located in the Eastern Region. The RAs participated in a week-long training  
16 course based at ECOPH. Training included didactic and field work components. The didactic portion  
17 detailed the study purpose and design and included an introductory clinical course on breast cancer and  
18 oncology basics. The field work component included proctored visits to local hospitals with gradually  
19 increased autonomy with survey administration. To promote consistency of the survey administration  
20 methods, all 4 RAs participated together in the initial portions of the study prior to traveling to their  
21 individually designated areas within the Eastern Region.  
22  
23  
24  
25

26 Both paper and electronic copies of the survey were distributed to all hospital directors prior to site  
27 visits by the RAs. The survey was administered through a structured interview with key administrative  
28 personnel, the most knowledgeable clinical specialist (eg, Medical Director, Hospital Superintendent,  
29 etc.) of each facility, or the lead breast cancer specialist. If a question was encountered that the  
30 respondent did not know, the appropriate person within the hospital was contacted. The RA returned to  
31 the hospital for follow-up of any missing questions after the respondent had acquired the necessary  
32 information. The in-person survey administration and follow-up of missing sections contributed to  
33 complete survey responses by all participating hospitals.  
34  
35  
36  
37  
38

### 39 *Hospital stratification*

40 In order to present the data in a meaningful manner, we developed a system to stratify hospitals based  
41 on the services they provided. The National Comprehensive Cancer Network's (NCCN) Framework for  
42 Resource Stratification of NCCN guidelines consists of 3 tiers: "Basic," "Core," and "Enhanced." These  
43 tiers are intended to provide guidelines for appropriate care in a resource-limited environment.[20]  
44 Although these guidelines were not developed as a stratification system, their tiered structure provides  
45 an intuitive way to describe care available at each hospital. The 3 sets of guidelines for Invasive Breast  
46 Cancer and for Breast Cancer Screening and Diagnosis were closely reviewed by our researchers, and the  
47 services necessary to provide the care detailed in each guideline were listed and used as the basis for  
48 the stratification system (Table 1).[21-26] In order for a hospital to be categorized as a specific level,  
49 they needed to offer all services for that level. In addition, the hospital had to offer the service greater  
50 than 80% of the time throughout the year, except as specified in Level 4.  
51  
52  
53  
54  
55  
56  
57  
58  
59  
60

1  
2  
3 We renamed the levels that reflect the NCCN “Basic,” “Core,” and “Enhanced” guidelines as Level 3, 2,  
4 and 1 respectively. The resources required to provide guideline-concordant care in a “Basic,” or Level 3  
5 hospital, were more extensive than what was available in the Eastern Region of Ghana. Thus, to better  
6 differentiate hospitals that offer limited services, we developed 3 additional levels: Level 6 is defined as  
7 hospitals that provided basic screening and clinical diagnosis, Level 5 hospitals provided screening,  
8 clinical diagnosis, and pathologic diagnosis, and Level 4 hospitals provided screening, clinical and  
9 pathologic diagnosis, and basic surgical services (Table 1). Hospitals that did not fulfill criteria for any of  
10 the levels were labeled as “Other”. The “Other” category included hospitals that perform no breast  
11 cancer care as well as hospitals that offered some services, but were missing important components of  
12 breast cancer care (for example, a hospital that had an ultrasound and x-ray machine, but did not  
13 perform CBE).  
14  
15  
16  
17  
18  
19  
20  
21  
22  
23  
24  
25  
26  
27  
28  
29  
30  
31  
32  
33  
34  
35  
36  
37  
38  
39  
40  
41  
42  
43  
44  
45  
46  
47  
48  
49  
50  
51  
52  
53  
54  
55  
56  
57  
58  
59  
60

| <b>Table 1</b>                                                                                                                                                                                                                                                                                                                                                                                                                                                                                                                                                                                                                                                                                                                                                                                                                                                                                                                                                                                                                                                                                                                                                                                                                |                                                                                                                                                                                                                                                                                                                                                                                                                                                                                                                                                                                                                                                                                                                                                                                                                                                                                        | <b>Hospital Stratification</b>                                                                                                                                                                                                                                                                                                                                                                                                                                                                                                                                                                                                                                                                                                                                              |                                                                                                                                                                                                                                                                                                                                                                       |
|-------------------------------------------------------------------------------------------------------------------------------------------------------------------------------------------------------------------------------------------------------------------------------------------------------------------------------------------------------------------------------------------------------------------------------------------------------------------------------------------------------------------------------------------------------------------------------------------------------------------------------------------------------------------------------------------------------------------------------------------------------------------------------------------------------------------------------------------------------------------------------------------------------------------------------------------------------------------------------------------------------------------------------------------------------------------------------------------------------------------------------------------------------------------------------------------------------------------------------|----------------------------------------------------------------------------------------------------------------------------------------------------------------------------------------------------------------------------------------------------------------------------------------------------------------------------------------------------------------------------------------------------------------------------------------------------------------------------------------------------------------------------------------------------------------------------------------------------------------------------------------------------------------------------------------------------------------------------------------------------------------------------------------------------------------------------------------------------------------------------------------|-----------------------------------------------------------------------------------------------------------------------------------------------------------------------------------------------------------------------------------------------------------------------------------------------------------------------------------------------------------------------------------------------------------------------------------------------------------------------------------------------------------------------------------------------------------------------------------------------------------------------------------------------------------------------------------------------------------------------------------------------------------------------------|-----------------------------------------------------------------------------------------------------------------------------------------------------------------------------------------------------------------------------------------------------------------------------------------------------------------------------------------------------------------------|
| <p><b>LEVEL 1 (NCCN Enhanced)</b><br/> <b>Screening and clinical diagnosis</b><br/>           -Clinical breast examination<br/>           -Mammography</p> <p><b>Pathologic confirmation &amp; Imaging</b><br/>           -Core needle biopsy<br/>           -Skin punch biopsy<br/>           -Pathological review (in house or external)<br/>           -ER/PR status testing (in house or external)<br/>           -HER2/neu status testing (in house or external)<br/>           -Ultrasound<br/>           -X Ray<br/>           -Mammography<br/>           -CT scan<br/>           -Bone scan<br/>           -Breast MRI<br/>           -Genetic counseling and genetic testing</p> <p><b>Surgical treatment</b><br/>           -Lumpectomy<br/>           -Mastectomy<br/>           -Axillary dissection<br/>           -Sentinel lymph node biopsy<br/>           -Breast reconstruction<br/>           -Oophorectomy (or medical ovarian suppression)</p> <p><b>Non-surgical treatment</b><br/>           -Chemotherapy<br/>           -Radiotherapy<br/>           -Endocrine therapy<br/>           -Trastuzumab<br/>           -Long term surveillance/follow up<br/>           -Supportive/palliative care</p> | <p><b>LEVEL 2 (NCCN Core)</b><br/> <b>Screening and clinical diagnosis</b><br/>           -Clinical breast examination</p> <p><b>Pathologic confirmation &amp; Imaging</b><br/>           -Core needle biopsy<br/>           -Pathological review (in house or external)<br/>           -ER/PR status testing (in house or external)<br/>           -Ultrasound<br/>           -X Ray<br/>           -Mammography</p> <p><b>Surgical treatment</b><br/>           -Lumpectomy<br/>           -Mastectomy<br/>           -Axillary dissection<br/>           -Sentinel lymph node biopsy<br/>           -Oophorectomy (or medical ovarian suppression)</p> <p><b>Non-surgical treatment</b><br/>           -Chemotherapy<br/>           -Radiotherapy<br/>           -Endocrine therapy<br/>           -Long term surveillance/follow up<br/>           -Supportive/palliative care</p> | <p><b>LEVEL 4</b><br/> <b>Screening and clinical diagnosis</b><br/>           -Clinical breast examination</p> <p><b>Pathologic confirmation &amp; Imaging</b><br/>           -Excisional biopsy, incisional biopsy, core needle biopsy, or fine needle aspiration cytology<br/>           -Pathological review (in house or external)<br/>           -Ultrasound<br/>           -X Ray</p> <p><b>Surgical treatment</b><br/>           -Mastectomy (always or sometimes available)*<br/>           -Axillary dissection (always or sometimes available)*</p>                                                                                                                                                                                                               |                                                                                                                                                                                                                                                                                                                                                                       |
|                                                                                                                                                                                                                                                                                                                                                                                                                                                                                                                                                                                                                                                                                                                                                                                                                                                                                                                                                                                                                                                                                                                                                                                                                               |                                                                                                                                                                                                                                                                                                                                                                                                                                                                                                                                                                                                                                                                                                                                                                                                                                                                                        | <p><b>LEVEL 3 (NCCN Basic)</b><br/> <b>Screening and clinical diagnosis</b><br/>           -Clinical breast examination</p> <p><b>Pathologic confirmation &amp; Imaging</b><br/>           -Excisional biopsy or incisional biopsy<br/>           -Pathological review (in house or external)<br/>           -ER/PR status testing (in house or external)<br/>           -Ultrasound<br/>           -X Ray<br/>           -Mammography</p> <p><b>Surgical treatment</b><br/>           -Mastectomy<br/>           -Axillary dissection<br/>           -Oophorectomy (or medical ovarian suppression)</p> <p><b>Non-surgical treatment</b><br/>           -Endocrine therapy<br/>           -Long term surveillance/follow up<br/>           -Supportive/palliative care</p> | <p><b>LEVEL 5</b><br/> <b>Screening and clinical diagnosis</b><br/>           -Clinical breast examination</p> <p><b>Pathologic confirmation &amp; Imaging</b><br/>           -Excisional biopsy, incisional biopsy, core needle biopsy, or fine needle aspiration cytology<br/>           -Pathological review (in house or external)<br/>           -Ultrasound</p> |
| <p><b>LEVEL 6</b><br/> <b>Screening and clinical diagnosis</b><br/>           -Clinical breast examination</p>                                                                                                                                                                                                                                                                                                                                                                                                                                                                                                                                                                                                                                                                                                                                                                                                                                                                                                                                                                                                                                                                                                                |                                                                                                                                                                                                                                                                                                                                                                                                                                                                                                                                                                                                                                                                                                                                                                                                                                                                                        | <p>Detailed list of services required to be categorized under each hospital level. A hospital must have ALL listed services to be categorized under a specific level. These services must be available &gt;80% of the time throughout the year unless otherwise specified. Level 6 represents a hospital with the fewest breast cancer services.<br/>           *"Sometimes available" includes hospitals that reported offering a service, but it is only available &lt;80% of the time throughout the year.</p>                                                                                                                                                                                                                                                           |                                                                                                                                                                                                                                                                                                                                                                       |



### *Mapping of available services*

Geographic Information Systems (GIS) technology was employed to derive the proximity of service availability and proportion of the population within a specified distance of key services. Each hospital location was geospatially visualized utilizing Esri ArcGIS Pro software (2020 Version 2.6) and proximity buffers extending outward in 5 kilometer (km) increments were generated. A 2018 LandScan population density raster from the Oak Ridge National Laboratory (Oak Ridge, TN), which depicts the dispersal of individuals throughout the region was used, and a zonal statistics tool was deployed to obtain population numbers contained within each of the 5 km proximity buffers. The results of the spatial analysis returned values for populations within each of the specified distances while presenting a visual representation of the data.

### *Hypothetical targeted resource allocation*

To observe the impact of a hypothetical targeted resource allocation, an additional spatial and population analysis was performed. The goal of this analysis was to evaluate access to breast cancer care after a modest addition of services at targeted hospitals. This hypothetical targeted resource allocation included 2 conditions aimed at modeling cost-effective expansion of care: 1) All hospitals were modeled to provide CBE. Under this assumption all hospitals are at least Level 6. 2) Hospitals that were missing only a single service in order to increase their level within the stratification system were modeled as if they provided that service. For example, a Level 6 hospital that only required the addition of ultrasound services in order to be categorized as Level 5 was modeled as a Level 5 hospital.

### *Reasonable travel distance*

For the spatial and population analyses, reasonable travel distances were established as 10 km, 25 km, and 45 km for screening, pathologic diagnosis, and surgical care respectively. The Lancet Commission on Global Surgery (LCoGS) describes access for essential surgery as being within 2 hours of a facility performing care.[27] Given the numerous aspects of cancer care however, this threshold is not easily transferable, and there are no established thresholds that describe geographic access to cancer care. A Ghanaian study found that patients greater than 10 km from a health facility were less likely to utilize laboratory screening services, so 10 km was established as our screening threshold.[28] In South Africa, women who lived greater than 20 km from a diagnostic hospital were more likely to have advanced disease at time of breast cancer diagnosis, so we established 25 km as our diagnosis threshold.[29] For surgical management, we established 45 km as our distance threshold to keep travel time typically less than 1 hour. This is based on a Ghanaian study that found greater than 80% of respondents reported they would rarely or irregularly utilize available health services if travel time was 1 hour or greater.[30]

### *Data analysis*

Descriptive statistics are presented as frequency and percentages. The hospital that was not surveyed was removed from the dataset and analysis was only run on the 33 hospitals with completed surveys. Analysis was performed using R software version 3.6.2 (R Core Team, 2019).

### *Patient and Public Involvement*

1  
2  
3 The GHS through the Eastern Regional Health Directorate has been involved with the entirety of this  
4 study from the development of the study concept through implementation. Results were presented to  
5 the GHS's Eastern Regional leadership, including a discussion of recommendations. These officials  
6 directly represent the public. Patients were not involved in this study.  
7  
8

### 9 *Ethical Approval*

10  
11 The study was reviewed and approved by the Ethical Review Committee of the Ghana Health Service,  
12 and was shared with the Regional Health Directorate of the Eastern Region. The protocol ID number is  
13 GHS-ERC 010/11/19.  
14  
15

### 16 **Results**

17 Thirty-three out of the 34 hospitals (97%) in the Eastern Region were surveyed. The single hospital not  
18 surveyed was due to lack of response. Surveyed hospitals included 1 regional hospital, 1 municipal  
19 hospital, 20 district hospitals, and 11 hospitals with no special designation. Sixteen of the hospitals were  
20 owned by the state, 9 were privately owned, 6 were owned by faith-based organizations, and 2 were  
21 quasi-government (hospitals with partial funding from the government).  
22  
23

24 A total of 350 healthcare workers involved with breast cancer care were reported across the 33 hospitals.  
25 Of these healthcare workers, 182 (56.2%) were MDs and 32 (97.0%) of the hospitals employed at least 1  
26 MD. The 182 MDs included 130 (71.4%) general practitioners without a specialty, 20 (11.0%) general  
27 surgeons, 24 (13.2%) obstetricians and gynecologists, 3 (1.6%) radiology specialists, 2 (1.1%) oncology  
28 specialists, 1 (0.5%) pathology specialist, 1 (0.5%) pathology consultant, and 1 (0.5%) plastic surgeon.  
29 General practitioners were employed at 29 (87.9%) hospitals, general surgeons at 13 (39.4%) hospitals,  
30 and ob/gyns at 17 (51.5%). The second largest group of healthcare workers were PAs with a total of 112  
31 in the region across 32 (97.0%) hospitals. Twenty-seven radiology technicians, 3 pathology technicians,  
32 and 26 social workers were also reported in the surveys. The 30 total radiology personnel (27 technicians  
33 and 3 specialists) were employed at 14 (42.4%) hospitals and the 5 pathology personnel (3 technicians, 1  
34 specialist, and 1 consultant) were all employed by the same hospital.  
35  
36

37 Breast cancer screening was mainly performed via CBE, and this was always available at 27 (81.8%) of the  
38 hospitals. None of the surveyed facilities had a mammogram machine. Ultrasound was available in 25  
39 (75%) facilities, and x-ray machines were available in 19 (57%) facilities. One hospital (3.0%) had a CT  
40 scanner, while MRI machines and PET scans were not available in the region.  
41  
42

43 For the pathologic diagnosis of breast cancer, excisional biopsy was offered at 18 hospitals (54.5%). Five  
44 of these sites also performed fine needle aspiration and core needle biopsy and 1 additional hospital  
45 offered core needle biopsy only. Thirty (90.9%) hospitals used an external lab for pathology, and 7 (21.2%)  
46 of these also had in house pathology services. Two (6.1%) hospitals utilized in house pathology services  
47 only. Only 1 (3.0%) hospital in the region had the capacity to perform immunohistochemistry to test for  
48 estrogen receptor (ER), progesterone receptor (PR), and human epidermal growth factor receptor 2  
49 (HER2) status.  
50  
51  
52  
53  
54  
55  
56  
57  
58  
59  
60

1  
2  
3 Thirteen hospitals (39.4%) provided surgery for the treatment of breast cancer. Six of these hospitals  
4 reported performing both mastectomy and wide local excision, and the other 7 provided wide local  
5 excision only. Four of the hospitals that performed both mastectomy and wide local excision also  
6 performed axillary surgery, but no facilities performed sentinel lymph node biopsy.  
7

8  
9 Two hospitals (6.1%) offered chemotherapy for breast cancer. One of them offered CAF  
10 (cyclophosphamide, doxorubicin, and fluorouracil) and the other provided CMF (cyclophosphamide,  
11 methotrexate, fluorouracil) chemotherapy. One of these hospitals (3.0%) offered endocrine therapy with  
12 tamoxifen. Radiotherapy was not available in any of the surveyed hospitals. Palliative care was available  
13 at 10 hospitals (30.3%).  
14  
15

16 When the hospital level stratification was applied, 3 hospitals were classified as Level 4, 8 were  
17 categorized as Level 5, and 16 were classified as Level 6 (Figure 1 and Table 2). The regional hospital,  
18 which is the main referral center in the region was categorized as Level 4, but the municipal hospital was  
19 categorized as Other (Table 2). No facilities in the Eastern region could provide the full spectrum of care  
20 detailed in the NCCN Framework for Resource Stratification (Levels 1, 2, and 3). The 3 facilities that  
21 offered the most breast cancer services required the addition of mammogram, endocrine therapy, and  
22 testing for ER/PR status in order to provide Level 3 (NCCN Basic) care.[21]  
23  
24  
25  
26  
27  
28  
29  
30  
31  
32  
33  
34  
35  
36  
37  
38  
39  
40  
41  
42  
43  
44  
45  
46  
47  
48  
49  
50  
51  
52  
53  
54  
55  
56  
57  
58  
59  
60

**Table 2**                      **Number of hospitals by level at the time of survey  
and after hypothetical targeted resource allocation**

| Hospital Level                              | Number of Hospitals<br>at time of survey | Number of Hospitals after<br>hypothetical targeted<br>resource allocation |
|---------------------------------------------|------------------------------------------|---------------------------------------------------------------------------|
| <b>Level 1</b> (NCCN Enhanced)              | <b>0</b>                                 | <b>0</b>                                                                  |
| <b>Level 2</b> (NCCN Core)                  | <b>0</b>                                 | <b>0</b>                                                                  |
| <b>Level 3</b> (NCCN Basic)                 | <b>0</b>                                 | <b>0</b>                                                                  |
| <b>Level 4</b> (screening + path + surgery) | <b>3</b>                                 | <b>6</b>                                                                  |
| Hospital type                               | 1 regional, 2 district                   | 1 regional, 5 district                                                    |
| Hospital ownership                          | 1 government, 2 CHAG                     | 3 government, 2 CHAG, 1 quasi-gov                                         |
| <b>Level 5</b> (screening + path)           | <b>8</b>                                 | <b>9</b>                                                                  |
| Hospital type                               | 5 district, 3 general                    | 5 district, 4 general                                                     |
| Hospital ownership                          | 3 govt, 1 CHAG, 1 quasi-govt, 3 private  | 4 govt, 1 CHAG, 4 private                                                 |
| <b>Level 6</b> (screening)                  | <b>16</b>                                | <b>18</b>                                                                 |
| Hospital type                               | 10 district, 6 general                   | 10 district, 1 municipal, 7 general                                       |
| Hospital ownership                          | 8 govt, 3 CHAG, 5 private                | 9 govt, 3 CHAG, 1 quasi-govt, 5 private                                   |
| <b>Other</b>                                | <b>6</b>                                 | <b>0</b>                                                                  |
| Hospital type                               | 3 district, 1 municipal, 2 general       |                                                                           |
| Hospital ownership                          | 4 govt, 1 quasi-govt, 1 private          |                                                                           |

Number of hospitals in each level at the time of survey and after hypothetical targeted resource allocation.

The hypothetical targeted resource allocation included the following two conditions:

- 1) All hospitals were modeled to provide CBE. Under this assumption all hospitals are at least Level 6.
- 2) Hospitals that were missing only a single service in order to increase their level within the stratification system were modeled as if they provided that service.

Abbreviations as follows: government (govt), Christian Health Association of Ghana (CHAG), hospital with no special designation (general), quasi-government (quasi-govt)

1  
2  
3 The spatial analysis using LandScan population data found that 52% of the population in the Eastern  
4 Region lived within 10 km of a hospital that provided breast cancer screening with CBE (Figure 2A), 64%  
5 of the population lived within 25 km of pathologic diagnosis services (Figure 2B), and 78% of the  
6 population lived within 45 km of basic surgical care (Figure 2C). Assessment of the hypothetical targeted  
7 resource allocation previously detailed was then performed. Implementing the first condition of the  
8 hypothetical resource allocation, modeling all hospitals to provide CBE, increased the population living  
9 within 10 km of basic screening from 52% to 60% (Figure 3A). This model impacted 6 hospitals that  
10 reported they did not perform or only sometimes performed CBE. Four of these hospitals would be  
11 upgraded to a Level 6, 1 would be upgraded to Level 5, and 1 would be upgraded to Level 4 with the  
12 addition of CBE only. For the second condition of the hypothetical resource allocation, 1 hospital was  
13 identified that required the addition of an ultrasound machine to be upgraded to Level 5 and 2 hospitals  
14 could be upgraded to Level 4 with the addition of an x-ray machine and breast biopsy, respectively  
15 (Table 2). If these services were added, the proportion of the population in the Eastern Region within 25  
16 km of a hospital that provided both screening and pathologic diagnostic services would increase to 74%  
17 (from 64%) (Figure 3B). The population within 45 km of a hospital that provided screening, pathologic  
18 diagnosis, and basic surgical care would increase to 81% (from 78%) (Figure 3C).  
19  
20  
21  
22  
23  
24

## 25 Discussion

26 The WHO provides a stepwise framework to guide the development of a National Cancer Control  
27 Program. The first step involves an in-depth situational analysis to identify where gaps in care exist.[31]  
28 Breast cancer is the most common cancer in Ghana,[1] and its incidence is increasing across SSA,[2,32]  
29 so analyzing breast cancer services and access to care is increasingly important. While enumerating  
30 various services might be straightforward, measuring true access is complex. Existing frameworks to  
31 measure access to care recognize numerous factors as important including socio-cultural, demographic,  
32 geographic, psychological, and organizational factors.[33] Previous research in Ghana has identified  
33 many patient level factors including lack of knowledge about the disease, fear of treatment, financial  
34 concerns, religious and social factors, and preference for care from traditional healers as reasons for  
35 delays in accessing care or incomplete treatment.[34-36] In contrast, system level and geographic  
36 factors have not been well studied. In addition, since publication of the “National Strategy for Cancer  
37 Control in Ghana: 2012-2016,” which outlined goals for equipment and infrastructure at various  
38 hospitals, no follow up studies have been conducted.[16] Our survey of 33 hospitals provides a detailed  
39 situational analysis of personnel and services available for breast cancer care in the Eastern Region of  
40 Ghana.  
41  
42  
43  
44  
45

46 Geographic considerations in access to care are a key element in describing capacity. Several recent  
47 studies have demonstrated the impact that distance from care has on breast cancer presentation in SSA.  
48 The African Breast Cancer Disparities in Outcomes Cohort Study identified that distance to a diagnostic  
49 health facility was independently associated with a delay in diagnosis of greater than 3 months and late  
50 diagnosis (Stage III/IV) for women with breast cancer in Namibia, Uganda, and Zambia.[37] In Ethiopia,  
51 rural residence and a distance greater than 5 km from a cancer referral center were associated with a  
52 delay greater than three months between onset of symptoms and medical consultation.[38] Lastly, a  
53 diagnostic hospital in South Africa identified that their patients who lived farther from the hospital were  
54  
55  
56  
57  
58  
59  
60

1  
2  
3 more likely to have late stage (Stage III/IV) breast cancer at time of diagnosis.[29] By including spatial  
4 analyses, we are able to geographically describe service availability, identify areas most in need of  
5 enhanced care, and quantify the impact that various capacity improvements can have on population  
6 level access.  
7

8  
9 The first step of the care pathway for breast cancer involves screening and early clinical diagnosis, which  
10 the WHO describes as the “cornerstone of breast cancer control” owing to the impact that stage at  
11 diagnosis has on outcomes.[39] This is illustrated in a 2016 study of over 1,000 Ghanaian women with  
12 breast cancer, which found cumulative 5-year survival rates of 91.94%, 59.93%, 33.95%, and 15.09% for  
13 stage 0 and I, II, III, and IV disease, respectively.[40] In our survey, we identified that no hospitals offered  
14 mammography. CBE was offered at 82% of the surveyed hospitals, but only about 50% of the population  
15 in the Eastern Region lived within 10 km of a Level 4, 5, or 6 hospital. If all hospitals started offering CBE,  
16 still only 60% of the population would be within 10 km of care. Given the limited access to screening and  
17 the fact that the majority of women in SSA present with late-stage disease,[6] guidance from the Breast  
18 Health Global Initiative suggests a focus on expansion of early detection services with CBE, rather than  
19 screening programs with mammography, should be prioritized.[41] Availability of CBE at non-hospital  
20 community level health facilities, which are more abundant and widespread than hospitals, is critical to  
21 expand services to reach a greater proportion of the population.  
22

23  
24 The next step of care is pathologic diagnosis. There are few publications about access to pathology  
25 services in Ghana. Estimates from a survey conducted by the International Academy of Pathology  
26 demonstrated limited access to pathology services in Ghana with only 30 pathologists in the entire  
27 country (1.1 per million population).[42] Our study reiterated the sparse availability of pathology  
28 services in Ghana with only one-third of hospitals meeting requirements for a Level 4 or 5 designation.  
29 We have identified a few hospitals offering in-house or send out pathology services and with GIS  
30 analysis found that 64% of the population in the Eastern Region lived within 25 km of a Level 4 or 5  
31 hospital. Nine hospitals reported always or sometimes offering in-house pathologic review of breast  
32 biopsies, but only 1 of these hospitals employed formally trained pathology personnel. In addition, none  
33 of the facilities which offered in-house services tested for ER, PR, or HER2 status, which is crucial in  
34 guiding appropriate therapies for breast cancer.[43] Many hospitals surveyed send pathology to other  
35 laboratories for evaluation, but this also has limitations. Wait times of 2 weeks to 1 month for results  
36 were most frequently reported. Only 1 hospital used an outside laboratory that performs ER/PR and  
37 HER2 testing. Development of surgical pathology services is time consuming and requires significant  
38 investment in equipment and education as demonstrated by the decade-long effort to develop  
39 pathology services at a teaching hospital in Kumasi, Ghana.[44] Because of this, further development of  
40 centralized pathology services with an emphasis on streamlining send out services should be prioritized  
41 as Ghana continues the long-term investment of increasing the pathology workforce.  
42

43  
44 The final step in breast cancer care, treatment, requires several medical specialties and treatment  
45 modalities. Four hospitals surveyed provided basic surgical care with mastectomy and axillary dissection  
46 and 2 hospitals offered mastectomy only. All of these hospitals and 7 additional hospitals also offered  
47 wide local excision. Sentinel lymph node biopsy was not available in the region. Availability of non-  
48 surgical therapies were more restricted, with limited chemotherapy available at 2 hospitals, endocrine  
49  
50

1  
2  
3 therapy at 1 hospital, and no radiotherapy services in the region. Although only 3 hospitals were  
4 categorized as Level 4, representing that they performed screening, pathologic diagnosis, and basic  
5 surgical care, a large share of the population (78%) lived within 45 km of one of those facilities. Further  
6 study needs to be done in SSA and Ghana to evaluate “how far is too far” in regards to cancer treatment  
7 accessibility, especially for services such as chemotherapy and radiation therapy that require extended  
8 periods of treatment with multiple trips to the hospital. Until that information is available, we believe  
9 that centralizing care by expanding non-surgical services at hospitals already categorized as Level 4 is a  
10 reasonable strategy to expand services. This would help to centralize care for patients in 1 hospital,  
11 potentially minimizing travel-related barriers and expenses.  
12  
13  
14  
15

16 The complex and interdisciplinary nature of cancer care makes reporting results of a situational analysis  
17 challenging. Presentation of data in a concise and actionable manner for use by the MOH and NGOs is  
18 crucial. This study used the NCCN tiered guidelines as a starting point to define appropriate care across a  
19 spectrum of resource levels. The stratification made it easy to identify what resources should be added  
20 next to expand care at a single facility. When applying this stratification system to hospitals in the  
21 Eastern Region, we identified that no hospitals had the resources to provide the care outlined in the  
22 NCCN “Basic” guidelines for low-resource areas.[21, 24] The lack of mammography services prevented  
23 all hospitals in the region from providing full care concurrent with the “Basic” guidelines, and lack of  
24 ER/PR testing was also a significant barrier.[21-23] By defining 3 additional “levels,” we were able to  
25 better describe the services available across the region. The GIS analysis added additional value to the  
26 survey results by determining the proportion of the population within a set distance from care. This  
27 analysis was utilized to evaluate the impact that potential resource allocation would have on the  
28 population, allowing for a more cost-effective and impactful expansion of care.  
29  
30  
31  
32  
33

### 34 **Limitations**

35  
36 There are a few limitations to address in this study. First, although it is modeled on PIPES and the WHO  
37 situational analysis tools, our novel survey tool has not been validated. The importance of expanding  
38 tools that enumerate surgical services lies in the multidisciplinary nature of cancer care, which extends  
39 well beyond surgical treatment. Second, this analysis only assessed geographic access to services using  
40 an Euclidean “straight line” distance from care, rather than actual travel time. Our study did not  
41 evaluate other significant barriers to care including transportation challenges, financial barriers, patient  
42 factors such as breast cancer awareness, facility capacity thresholds, and cultural factors. This means  
43 that our population analysis likely overestimated the proportion of the population with access to breast  
44 cancer care. Additionally, because of these other barriers in access to care, the proposed hypothetical  
45 targeted resource allocation may not lead to improved access or utilization of care if other factors are  
46 not addressed. Third, only hospitals were surveyed, so there may be non-hospital health facilities and  
47 local healthcare workers offering select services that were not captured by our assessment. Because of  
48 the limited availability of resources observed in the included hospitals however, we believe it is unlikely  
49 these non-hospital facilities provide cancer services that would significantly change our estimations. In  
50 addition, 1 hospital declined to participate in the survey. This was a small hospital that was not expected  
51 to provide comprehensive breast cancer services. In addition, it is geographically close to other hospitals  
52  
53  
54  
55  
56  
57  
58  
59  
60



1  
2  
3 that were surveyed, so is unlikely to have impacted our population analysis. Fourth, many hospitals  
4 employed locum doctors who work at more than 1 hospital. This may have inflated the absolute  
5 numbers of providers reported, but does not impact the number of hospitals that employ specific  
6 providers. Lastly, as this study was confined to the Eastern Region, there may be facilities just beyond  
7 the borders in another region that provide care. This would skew the spatial analysis for areas along the  
8 border since individuals are able to access care in any region. We anticipate that the possibility of para-  
9 regional access will be more clearly elucidated in the ongoing nationwide expansion of this survey.  
10  
11

## 12 13 **Conclusions**

14  
15 This study accomplished an in-depth situational analysis of available breast cancer care in the Eastern  
16 Region of Ghana using a novel facility-based survey tool. By stratifying each hospital and performing GIS  
17 analysis to identify areas most in need of services, the results of the survey can be used by the MOH to  
18 target cost-effective and guideline-concordant resource allocation to improve breast cancer care in  
19 Ghana. Based on the results of the study, we suggest 2 priorities in the Eastern Region: 1) expansion of  
20 screening and early diagnosis services with CBE by ensuring it is available at all hospitals, and leveraging  
21 providers at non-hospital health facilities to provide CBE, and 2) centralization of treatment (surgery,  
22 chemotherapy, and radiotherapy services) to select hospitals to help streamline patient care until  
23 resources are available to expand services in more hospitals across the region.  
24  
25  
26  
27  
28  
29  
30  
31  
32  
33  
34  
35  
36  
37  
38  
39  
40  
41  
42  
43  
44  
45  
46  
47  
48  
49  
50  
51  
52  
53  
54  
55  
56  
57  
58  
59  
60

## Citations

- 1 The Global Cancer Observatory: Globocan 2020, Ghana, 2020.  
<https://gco.iarc.fr/today/data/factsheets/populations/288-ghana-fact-sheets.pdf>.
- 2 Adeloje D, Sowunmi OY, Jacobs W, *et al*. Estimating the incidence of breast cancer in Africa: a systematic review and meta-analysis. *J Glob Health* 2018;8:010419.
- 3 Allemani C, Matsuda T, Di Carlo V, *et al*. Global surveillance of trends in cancer survival 2000-14 (CONCORD-3): analysis of individual records for 37 513 025 patients diagnosed with one of 18 cancers from 322 population-based registries in 71 countries. *Lancet* 2018;391:1023–75.
- 4 McCormack V, McKenzie F, Foerster M, *et al*. Breast cancer survival and survival gap apportionment in sub-Saharan Africa (ABC-DO): a prospective cohort study. *Lancet Glob Health* 2020;8:e1203–12.
- 5 Ssentongo P, Lewcun JA, Candela X, *et al*. Regional, racial, gender, and tumor biology disparities in breast cancer survival rates in Africa: A systematic review and meta-analysis. *PLoS One* 2019;14:e0225039.
- 6 Jedy-Agba E, McCormack V, Adebamowo C, *et al*. Stage at diagnosis of breast cancer in sub-Saharan Africa: a systematic review and meta-analysis. *Lancet Glob Health* 2016;4:e923–35.
- 7 Brunier, A. New global breast cancer initiative highlights renewed commitment to improve survival. World Health Organization Departmental News, 8 March 2021.  
<https://www.who.int/news/item/08-03-2021-new-global-breast-cancer-initiative-highlights-renewed-commitment-to-improve-survival> (accessed 5 Sept 2021).
- 8 Ghana Health Service: Regions. <https://ghs.gov.gh> (accessed 7 Sept 2021).
- 9 [dataset] World Bank, Ghana Country Profile. Data from: World Development Indicators database. [https://databank.worldbank.org/views/reports/reportwidget.aspx?Report\\_Name=CountryProfile&id=b450fd57&tbar=y&dd=y&inf=n&zm=n&country=GHA](https://databank.worldbank.org/views/reports/reportwidget.aspx?Report_Name=CountryProfile&id=b450fd57&tbar=y&dd=y&inf=n&zm=n&country=GHA) (accessed 5 Sept 2021).
- 10 Fleming, Sean. The World Bank's 2020 country classifications explained, 3 Aug 2020.  
<https://www.weforum.org/agenda/2020/08/world-bank-2020-classifications-low-high-income-countries/> (accessed 20 Aug 2021).
- 11 [dataset] World Bank, Gross national income per capita 2019, Atlas method and PPP. Data from: World Development Indicators database, 12 February 2021.  
<https://databank.worldbank.org/data/download/GNIPC.pdf> (accessed 20 Aug 2021).
- 12 Saleh, K. The Health Sector in Ghana: A Comprehensive Assessment, pg 6. Washington, DC: The World Bank, 2013. doi: 10.1596/978-0-8213-9599-8.
- 13 National Health Insurance Authority. 2013 Annual Report, pg 5.  
<http://www.nhis.gov.gh/files/2013%20Annual%20Report-Final%20over%2029.09.14.pdf> (accessed 25 Aug, 2021).

- 14 Ghana National Drugs Programme (GNDP). Standard Treatment Guidelines: Ministry of Health, Seventh Edition (7<sup>th</sup>), 2017, pgs 655-656. <https://www.moh.gov.gh/wp-content/uploads/2020/07/GHANA-STG-2017-1.pdf> (accessed 1 Sept 2021).
- 15 Institute for Health Metrics and Evaluation (IHME). Health Service Provision in Ghana: Assessing Facility Capacity and Costs of Care. Seattle, WA: IHME, 2015. [http://www.healthdata.org/sites/default/files/files/policy\\_report/2015/ABCE\\_Ghana\\_finalreport\\_Jan2015.pdf](http://www.healthdata.org/sites/default/files/files/policy_report/2015/ABCE_Ghana_finalreport_Jan2015.pdf) (accessed 30 Aug 2021).
- 16 Ministry of Health, Ghana, National Strategy for Cancer Control in Ghana 2012-2016, 2011. <https://www.iccp-portal.org/sites/default/files/plans/Cancer%20Plan%20Ghana%202012-2016.pdf>
- 17 Eastern Regional Co-ordinating Council, Eastern Regional Official Website: Profile of the Eastern Region, 2016. <http://www.easternregion.gov.gh/index.php/profile/>.
- 18 World Health Organization (WHO), WHO Global Initiative for Emergency and Essential Surgical Care, 25 September 2019. <http://www.who.int/surgery/globalinitiative/en/>.
- 19 Surgeons Overseas, SOS PIPES Surgical Capacity Assessment Tool. 2017. [http://www.adamkushnermd.com/files/PIPES\\_tool\\_103111.pdf](http://www.adamkushnermd.com/files/PIPES_tool_103111.pdf)
- 20 National Comprehensive Cancer Network, NCCN Framework for Resource Stratification of NCCN Guidelines (NCCN Framework™), 2021. <https://www.nccn.org/framework/default.aspx>.
- 21 National Comprehensive Cancer Network. Invasive Breast Cancer: Basic Resources Version 2.2017, 2018. [https://www.nccn.org/professionals/physician\\_gls/pdf/breast\\_basic.pdf](https://www.nccn.org/professionals/physician_gls/pdf/breast_basic.pdf).
- 22 National Comprehensive Cancer Network. Invasive Breast Cancer: Core Resources Version 2.2017, 2018. [https://www.nccn.org/professionals/physician\\_gls/pdf/breast\\_core.pdf](https://www.nccn.org/professionals/physician_gls/pdf/breast_core.pdf).
- 23 National Comprehensive Cancer Network. Invasive Breast Cancer: Enhanced Resources Version 2.2017, 2018. [https://www.nccn.org/professionals/physician\\_gls/pdf/breast\\_enhanced.pdf](https://www.nccn.org/professionals/physician_gls/pdf/breast_enhanced.pdf).
- 24 National Comprehensive Cancer Network. Breast Cancer Screening and Diagnosis: Basic Resources Version 3.2018, 2018. [https://www.nccn.org/professionals/physician\\_gls/pdf/breast-screening\\_basic.pdf](https://www.nccn.org/professionals/physician_gls/pdf/breast-screening_basic.pdf).
- 25 National Comprehensive Cancer Network. Breast Cancer Screening and Diagnosis: Core Resources Version 3.2018, 2018. [https://www.nccn.org/professionals/physician\\_gls/pdf/breast-screening\\_core.pdf](https://www.nccn.org/professionals/physician_gls/pdf/breast-screening_core.pdf).
- 26 National Comprehensive Cancer Network. Breast Cancer Screening and Diagnosis: Enhanced Resources Version 3.2018, 2018. [https://www.nccn.org/professionals/physician\\_gls/pdf/breast-screening\\_enhanced.pdf](https://www.nccn.org/professionals/physician_gls/pdf/breast-screening_enhanced.pdf).
- 27 Meara JG, Greenberg SLM. The Lancet Commission on Global Surgery Global surgery 2030: Evidence and solutions for achieving health, welfare and economic development. *Surgery* 2015;157:834–5.

- 1  
2  
3 28 Der JB, Grint D, Narh CT, *et al.* Where are patients missed in the tuberculosis diagnostic cascade? A  
4 prospective cohort study in Ghana. *PLoS One* 2020;15:e0230604.  
5  
6 29 Dickens C, Joffe M, Jacobson J, *et al.* Stage at breast cancer diagnosis and distance from diagnostic  
7 hospital in a periurban setting: a South African public hospital case series of over 1,000 women. *Int*  
8 *J Cancer* 2014;135:2173–82.  
9  
10 30 Buor D. Analysing the primacy of distance in the utilization of health services in the Ahafo-Ano  
11 South district, Ghana. *Int J Health Plann Manage* 2003;18:293–311.  
12  
13 31 World Health Organization (WHO), National Cancer Control Programmes (NCCP), 3 February  
14 2017. <http://www.who.int/cancer/nccp/en/>.  
15  
16 32 Joko-Fru WY, Jedy-Agba E, Korir A, *et al.* The evolving epidemic of breast cancer in sub-Saharan  
17 Africa: Results from the African Cancer Registry Network. *Int J Cancer* 2020;147:2131–41.  
18  
19 33 Gurch Randhawa KR. Access to Healthcare: Issues of Measure and Method. *Prim Health Care Res*  
20 *Dev* 2013;03. doi:10.4172/2167-1079.1000136  
21  
22 34 Obrist M, Osei-Bonsu E, Awuah B, *et al.* Factors related to incomplete treatment of breast cancer in  
23 Kumasi, Ghana. *Breast* 2014;23:821–8.  
24  
25 35 Clegg-Lampsey J, Dakubo J, Attobra YN. Why do breast cancer patients report late or abscond  
26 during treatment in Ghana? A pilot study. *Ghana Med J* 2009;43:127–31.  
27  
28 36 Agbokey F, Kudzawu E, Dzodzomenyo M, *et al.* Knowledge and Health Seeking Behaviour of Breast  
29 Cancer Patients in Ghana. *Int J Breast Cancer* 2019;2019:5239840.  
30  
31 37 Togawa K, Anderson BO, Foerster, M, *et al.* Geospatial barriers to healthcare access for breast  
32 cancer diagnosis in sub-Saharan African settings: The African Breast Cancer–Disparities in  
33 Outcomes Cohort Study. *Int J Cancer* 2020;1-15.  
34  
35 38 Tesfaw A, Demis S, Munye T, Ashuro Z. Patient delay and contributing factors among breast cancer  
36 patients at two cancer referral centres in Ethiopia: A cross-sectional study. *J Multidiscip Healthc*  
37 2020;13:1391-1401.  
38  
39 39 World Health Organization (WHO), Breast Cancer: Prevention and Control, 2016.  
40 <https://www.who.int/cancer/detection/breastcancer/en/>.  
41  
42 40 Mensah AC, Yarney J, Nokoe SK, *et al.* Survival outcomes of breast cancer in Ghana: an analysis of  
43 clinicopathological features. *Open Access Library Journal* 2016;3:1–11.  
44  
45 41 Ginsburg O, Yip C-H, Brooks A, *et al.* Breast cancer early detection: A phased approach to  
46 implementation. *Cancer* 2020;126 Suppl 10:2379–93.  
47  
48 42 African Strategies for Advancing Pathology, IAP Survey Results Summary: Summary for Ghana,  
49 2019. <http://www.pathologyinafrica.org/surveydata/summary-data-country.php?id=020>.  
50  
51 43 Hunt KK, Mittendorf EA. Diseases of the Breast. In: Townsend CM, Beauchamp RD, Evers BM, *et al.*,  
52 eds. *Sabiston textbook of surgery: the biological basis of modern surgical practice*.  
53  
54  
55  
56  
57  
58  
59  
60

1  
2  
3 Elsevier/Saunders 2017:819–64.  
4

- 5 44 Stalsberg H, Adjei EK, Owusu-Afriyie O, *et al*. Sustainable Development of Pathology in Sub-Saharan  
6 Africa: An Example From Ghana. *Arch Pathol Lab Med* 2017;141:1533–9.  
7  
8  
9  
10  
11  
12  
13  
14  
15  
16  
17  
18  
19  
20  
21  
22  
23  
24  
25  
26  
27  
28  
29  
30  
31  
32  
33  
34  
35  
36  
37  
38  
39  
40  
41  
42  
43  
44  
45  
46  
47  
48  
49  
50  
51  
52  
53  
54  
55  
56  
57  
58  
59  
60

### Author Contribution Statement

All authors discussed the results of the project, critically revised the manuscript, and approved the final version, this was the primary role for authors S.M. and K.E.B. In addition, the following authors had additional responsibilities: M.K.M. designed and organized the project, oversaw data collection, and wrote the manuscript with M.E.M. and F.L-V. M.E.M. and F.L-V. analyzed and interpreted the data and wrote the manuscript with M.K.M. O.S. was involved with project design. A.B-N. and I.O. assisted with organization and design of the project and provided local support. J.S. assisted with analyzing the data, performed the geospatial analysis, and created the maps. J.N. and A.G. assisted with organization and management of the project. A.K. was the lead research assistant and helped to coordinate local data collection efforts. R.R.P. and E.K.S. designed, organized, and oversaw the entirety of the project and are senior investigators.

### Acknowledgements

We would like to acknowledge Dr. Florence Dedey and Dr. Grace Ayensu-Danquah for their support throughout this project.

### Figure Legends

**Table 1** Hospital Stratification. Detailed list of services required to be categorized under each hospital level. A hospital must have ALL listed services to be categorized under a specific level. These services must be available >80% of the time throughout the year unless otherwise specified. Level 6 represents a hospital with the fewest breast cancer services.

\*"Sometimes available" includes hospitals that reported offering a service, but it is only available <80% of the time throughout the year.

**Table 2** Number of hospitals in each level at the time of survey and after hypothetical targeted resource allocation. The hypothetical targeted resource allocation included the following two conditions: 1) All hospitals were modeled to provide CBE. Under this assumption all hospitals are at least Level 6. 2) Hospitals that were missing only a single service in order to increase their level within the stratification system were modeled as if they provided that service. Abbreviations as follows: government (govt), Christian Health Association of Ghana (CHAG), hospital with no special designation (general), quasi-government (quasi-govt)

**Figure 1** Map depicting the stratification level and location of hospitals in the Eastern Region of Ghana. Black lines depict borders for districts within the Eastern Region.

**Figure 2** Proximity maps depicting the stratification level and location of hospitals in the Eastern Region of Ghana. Each concentric circle depicts a 5km distance from the corresponding hospital. A) Hospitals providing screening services (Levels 1-6). B) Hospitals providing diagnostic services (Levels 1-5). C) Hospitals providing surgical management (Levels 1-4).

**Figure 3** Proximity maps depicting the stratification level and location of hospitals in the Eastern Region of Ghana after hypothetical targeted resource allocation. Each concentric circle depicts a 5km distance from the corresponding hospital. A) Hospitals hypothetically providing screening services (Levels 1-6). B) Hospitals hypothetically providing diagnostic services (Levels 1-5). C) Hospitals hypothetically providing surgical management (Levels 1-4).







1  
2  
3  
4  
5  
6  
7  
8  
9  
10  
11  
12  
13  
14  
15  
16  
17  
18  
19  
20  
21  
22  
23  
24  
25  
26  
27  
28  
29  
30  
31  
32  
33  
34  
35  
36  
37  
38  
39  
40  
41  
42  
43  
44  
45  
46  
47

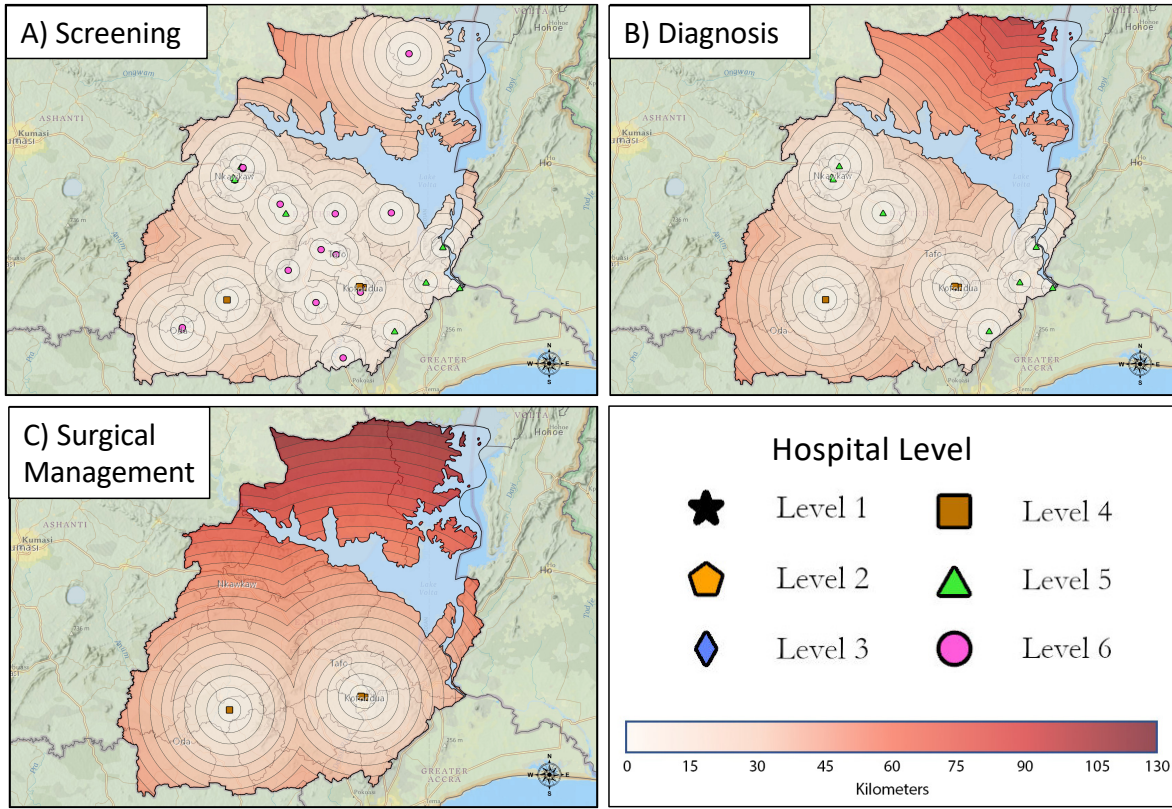

**Figure 2** Proximity maps depicting the stratification level and location of hospitals in the Eastern Region of Ghana. Each concentric circle depicts a 5km distance from the corresponding hospital. A) Hospitals providing screening services (Levels 1-6). B) Hospitals providing diagnostic services (Levels 1-5). C) Hospitals providing surgical management (Levels 1-4).



**Figure 3** Proximity maps depicting the stratification level and location of hospitals in the Eastern Region of Ghana after hypothetical targeted resource allocation. Each concentric circle depicts a 5km distance from the corresponding hospital. A) Hospitals hypothetically providing screening services (Levels 1-6). B) Hospitals hypothetically providing diagnostic services (Levels 1-5). C) Hospitals hypothetically providing surgical management (Levels 1-4).

## Breast PIPES Data Entry

|                                                                                                                                                                                                                                                                                                                                                                                                                                                                                                                                                                             |                                                                                                                                                                                                                                                                       |                                                                                                                                                                                                                                                                                                                                                                                                                                                                                                                                                                                                                      |                                                                                                                                                                                                                                   |
|-----------------------------------------------------------------------------------------------------------------------------------------------------------------------------------------------------------------------------------------------------------------------------------------------------------------------------------------------------------------------------------------------------------------------------------------------------------------------------------------------------------------------------------------------------------------------------|-----------------------------------------------------------------------------------------------------------------------------------------------------------------------------------------------------------------------------------------------------------------------|----------------------------------------------------------------------------------------------------------------------------------------------------------------------------------------------------------------------------------------------------------------------------------------------------------------------------------------------------------------------------------------------------------------------------------------------------------------------------------------------------------------------------------------------------------------------------------------------------------------------|-----------------------------------------------------------------------------------------------------------------------------------------------------------------------------------------------------------------------------------|
| <p><b>Section A – 1: Basic Information</b></p> <ol style="list-style-type: none"> <li>Region:</li> <li>District:</li> <li>Date:</li> <li>Name:</li> <li>Respondent Phone:</li> <li>Title:</li> <li>Facility:</li> <li>Address:</li> <li>GPS Lat: _____ Long: _____</li> <li>Facility Phone:</li> <li>Facility Email:</li> <li>RA:</li> <li>RA Phone:</li> </ol>                                                                                                                                                                                                             | <p><b>Section B – 1: Onsite Imaging</b></p> <p>All [Y/N] + Availability [1/0]<br/>Example: Y/1, Y/0 or N</p> <ol style="list-style-type: none"> <li>CBE</li> <li>Mammogram</li> <li>US</li> <li>XR</li> <li>MRI</li> <li>CT</li> <li>PET</li> <li>Genetics</li> </ol> | <p><b>B – 1</b></p> <ol style="list-style-type: none"> <li>_____</li> <li>_____</li> <li>_____</li> <li>_____</li> <li>_____</li> <li>_____</li> <li>_____</li> <li>_____</li> </ol>                                                                                                                                                                                                                                                                                                                                                                                                                                 |                                                                                                                                                                                                                                   |
| <p><b>Section A – 2: Facility Information</b></p> <ol style="list-style-type: none"> <li>Facility Type (1-6):           <ol style="list-style-type: none"> <li>Teaching</li> <li>Regional</li> <li>Metropolitan</li> <li>Municipal</li> <li>District</li> <li>Hospital</li> </ol> </li> <li>Facility Ownership (1-5):           <ol style="list-style-type: none"> <li>Government</li> <li>Quasi government</li> <li>Private</li> <li>CAHG</li> <li>Other faith based, <i>indicate</i></li> </ol> </li> <li>Breast clinic [Y/N]:</li> <li>Cervical clinic [Y/N]:</li> </ol> | <p><b>A – 2</b></p> <ol style="list-style-type: none"> <li>_____</li> <li>_____</li> <li>_____</li> <li>_____</li> </ol>                                                                                                                                              | <p><b>Section B – 2: Mammogram Sub Survey</b></p> <ol style="list-style-type: none"> <li>Keep records [Y/N]:</li> <li>Number records (1-4):</li> <li>Free to patient (Y/N):</li> <li>If no, cost<br/>(1=&lt;100 2=100-500 3=&gt;500):</li> <li>Insurance covered (Y/N)</li> <li>Which (1=NHIS or 2=Private, list):</li> <li>100% by NHIS (Y/N)</li> <li>Who interprets<br/>(1=Outside facility 2 = in house non rad 3 = in house cons rad 4 = in house spec rads 5 = other, list):</li> <li>External review? (1 = Ghana 2 = Outside GH):</li> <li>External facility name:</li> <li>Time for results (1-3)</li> </ol> | <p><b>B – 2</b></p> <ol style="list-style-type: none"> <li>_____</li> </ol> |
| <p><b>Section A – 3: Personnel Number</b></p> <p>If none, indicate with "0".</p> <ol style="list-style-type: none"> <li>MD surgeon: _____</li> <li>MD Ob/Gyn: _____</li> <li>MD Gyn/Onc: _____</li> <li>MD plastic surgeon: _____</li> <li>Radiologist: ___T ___S ___C</li> <li>Pathologist: ___T ___S ___C</li> <li>Oncologist: ___S ___C</li> <li>Rad Onc: ___S ___C</li> <li>Physician Assistant: _____</li> <li>Social worker: _____</li> </ol>                                                                                                                         | <p><b>Section B – 3: Pap and HPV</b></p> <p>All [Y/N] + Availability [1/0]<br/>Ex: Y/1, Y/0 or N</p> <ol style="list-style-type: none"> <li>Pap</li> <li>HPV</li> <li>HPV 16/18</li> <li>HPV (1=provider 2=patient)</li> <li>HPV vaccine</li> </ol>                   | <p><b>B – 3</b></p> <ol style="list-style-type: none"> <li>_____</li> <li>_____</li> <li>_____</li> <li>_____</li> <li>_____</li> </ol>                                                                                                                                                                                                                                                                                                                                                                                                                                                                              |                                                                                                                                                                                                                                   |

|                                                                                                                                                                                                                                                                                                                                                                                                                                                                                                                     |                                                                                                                                                                                                                                                                      |                                                                                                                                                                                                                                                                                                                                                                                                                                                                                                                                                                       |                                                                                                                                                                                |
|---------------------------------------------------------------------------------------------------------------------------------------------------------------------------------------------------------------------------------------------------------------------------------------------------------------------------------------------------------------------------------------------------------------------------------------------------------------------------------------------------------------------|----------------------------------------------------------------------------------------------------------------------------------------------------------------------------------------------------------------------------------------------------------------------|-----------------------------------------------------------------------------------------------------------------------------------------------------------------------------------------------------------------------------------------------------------------------------------------------------------------------------------------------------------------------------------------------------------------------------------------------------------------------------------------------------------------------------------------------------------------------|--------------------------------------------------------------------------------------------------------------------------------------------------------------------------------|
| <p><b>C – 1: Breast Procedures</b></p> <ol style="list-style-type: none"> <li>1. Biopsy FNA [Y1, Y0 or N]</li> <li>2. Biopsy Core Needle [Y1, Y0 or N]</li> <li>3. Excisional Bx [Y1, Y0 or N]</li> <li>4. In house review [Y1, Y0 or N]</li> <li>5. External review [Y1, Y0 or N]</li> <li>6. If ext, name and country:</li> <li>7. Result time (1-3)</li> <li>8. Stain for immuno [Y1, Y0 or N]</li> <li>9. ER stain [Y1, Y0 or N]</li> <li>10. PR stain [Y1, Y0 or N]</li> <li>11. HER2 [Y1, Y0 or N]</li> </ol> | <p><b>C – 1</b></p> <ol style="list-style-type: none"> <li>1. _____</li> <li>2. _____</li> <li>3. _____</li> <li>4. _____</li> <li>5. _____</li> <li>6. _____</li> <li>7. _____</li> <li>8. _____</li> <li>9. _____</li> <li>10. _____</li> <li>11. _____</li> </ol> | <p><b>D – 1: Chemotherapy</b></p> <ol style="list-style-type: none"> <li>1. Chemo [Y1, Y0 or N]</li> <li>2. 1=For Breast, 2=Cervical, 3=Both</li> <li>3. Which agents (1-10)</li> <li>4. Combinations used:</li> <li>5. Endocrine [Y1, Y0 or N]</li> <li>6. Which agents? (1 – 7)</li> </ol>                                                                                                                                                                                                                                                                          | <p><b>D – 1</b></p> <ol style="list-style-type: none"> <li>1. _____</li> <li>2. _____</li> <li>3. _____</li> <li>4. write _____</li> <li>5. _____</li> <li>6. _____</li> </ol> |
| <p><b>C – 2: Staging</b></p> <ol style="list-style-type: none"> <li>1. Staging [Y1, Y0 or N]</li> <li>2. If yes, how? (1 = CE only, 2 = CE + imaging)</li> <li>4. Imaging for staging (1-5, list all) (1=XR 2=CT 3=US 4=MRI 5=PET)</li> <li>5. Pathological staging? [Y1, Y0 or N]</li> </ol>                                                                                                                                                                                                                       | <p><b>C – 2</b></p> <ol style="list-style-type: none"> <li>1. _____</li> <li>2. _____</li> <li>3. _____</li> <li>4. _____</li> <li>5. _____</li> </ol>                                                                                                               | <p><b>D – 2: Radiation</b></p> <ol style="list-style-type: none"> <li>1. Offer radiation? [Y1, Y0 or N]</li> <li>2. If no, refer? [Y/N]</li> <li>3. Where?</li> <li>4. Type of radiation? (1=external beam 2=brachy 3=other, write)</li> </ol>                                                                                                                                                                                                                                                                                                                        | <p><b>D – 2</b></p> <ol style="list-style-type: none"> <li>1. _____</li> <li>2. _____</li> <li>3. _____</li> <li>4. _____</li> </ol>                                           |
| <p><b>C – 3: Breast Surgery</b></p> <ol style="list-style-type: none"> <li>1. Breast surgery [Y1, Y0 or N]</li> <li>2a.WLE/Lump [Y1, Y0 or N]</li> <li>2b.Mastectomy [Y1, Y0 or N]</li> <li>2c.Ax Surg [Y1, Y0 or N]</li> <li>3.If yes Ax, SLN map? [Y1, Y0 or N]</li> <li>3a.Dye</li> <li>3b.Radio</li> <li>4.Reconstruction? [Y1, Y0 or N]</li> <li>5.Which (1=expander/implant 2=rotation flap 3=free flap)</li> </ol>                                                                                           | <p><b>C – 3</b></p> <ol style="list-style-type: none"> <li>1. _____</li> <li>2a. _____</li> <li>2b. _____</li> <li>2c. _____</li> <li>3. _____</li> <li>3a. _____</li> <li>3b. _____</li> <li>4. _____</li> <li>5. _____</li> </ol>                                  | <p><b>D – 3: Follow Up</b></p> <ol style="list-style-type: none"> <li>1. Long term F/U (Y/N)</li> <li>2. How F/U (1-4) 1=phone 2=home 3=clinic 4=other</li> <li>3. Registry</li> <li>4. Cancer outreach</li> <li>5. Counseling</li> <li>6. Palliative care?</li> </ol>                                                                                                                                                                                                                                                                                                | <p><b>D – 3</b></p> <ol style="list-style-type: none"> <li>1. _____</li> <li>2. _____</li> <li>3. _____</li> <li>4. _____</li> <li>5. _____</li> <li>6. _____</li> </ol>       |
| <p><b>C – 4: Cervical Procedures</b></p> <ol style="list-style-type: none"> <li>1. Gynecologic surgery [Y1, Y0 or N]</li> <li>2. Which (1=simple hyst 2 = rad hyst 3 = trachelectomy)</li> <li>3. For cervical cancer? Y/N</li> <li>4. VIA</li> <li>5. VILI</li> <li>6. Colp:</li> <li>7. Cryo:</li> <li>8. Cervical bx:</li> <li>9. LEEP:</li> <li>10. Cold knife cone:</li> <li>11. Other</li> </ol>                                                                                                              | <p><b>C – 4</b></p> <ol style="list-style-type: none"> <li>1. _____</li> <li>2. _____</li> <li>3. _____</li> <li>4. _____</li> <li>5. _____</li> <li>6. _____</li> <li>7. _____</li> <li>8. _____</li> <li>9. _____</li> <li>10. _____</li> <li>11. _____</li> </ol> | <p><b>Notes</b></p> <p>Chemo Numbers</p> <ol style="list-style-type: none"> <li>1. Cyclophosphamide</li> <li>2. Doxorubicin (Adriamycin)</li> <li>3. 5 FU</li> <li>4. Methotrexate</li> <li>5. Epirubicin</li> <li>6. Doxetaxel</li> <li>7. Paclitaxel</li> <li>8. Carboplatin</li> <li>9. Cisplatin</li> <li>10. Others, list</li> </ol> <p>Endocrine Numbers</p> <ol style="list-style-type: none"> <li>1. Tamoxifen</li> <li>2. Anastrozole</li> <li>3. Esemestane</li> <li>4. Fulvestrant</li> <li>5. Goserlin</li> <li>6. Letrozole</li> <li>7. Other</li> </ol> |                                                                                                                                                                                |

## Breast and Cervical PIPES (BCP) Question Guide and Data Dictionary

Yes/No answers should be recorded as Y or N

Available/Not Always Available should be indicated by 1 (Available) or 0 (Not always available) after the Y or N.

For example, a mammogram that exists but is not always available should be indicated as Y/0.

If there is no mammogram at all, it should be indicated as N.

### Section A – 1: Contact information.

1. Region name
2. District Name
3. Date
4. Respondent Name
5. Respondent Phone
6. His/Her Title
7. Name of Facility
8. Facility Address
9. GPS coordinates
10. Facility Phone
11. Research Assistant Name
12. RA Phone.

### Section A – 2 Facility Information

1. Facility Type, write number.
  - a. 1 = Teaching
  - b. 2 = Regional
  - c. 3 = Metropolitan
  - d. 4 = Municipal
  - e. 5 = District
  - f. 6 = Hospital
2. Facility Ownership, write number.
  - a. 1 = Government
  - b. 2 = Quasi government
  - c. 3 = Private
  - d. 4 = CAHG
  - e. 5 = Other faith based, *indicate*
3. Breast clinic: Does your facility have a breast clinic? Indicate with Y/N
4. Cervical clinic: Does your facility have cervical clinic? Y/N

### Section A – 3: Personnel

For this section indicate the number of personnel as asked. For some specialties, note the number of technicians (T), specialists (S), and consultants (C).

### Section B – 1: Imaging Capacity

Ask if they have the listed diagnostic modalities by indicating Y/N, followed by nearly always available (1) or not always available (0).

Example 1: MRI always available = Y-1.

Example 2: XRay not always available = Y-0

Example 3: No CT scan = N

### Section B – 2 Mammogram Sub Survey

1. Do they keep records? Y/N
2. Number of mammograms per month that the facility performs
  - a. 1 = 1-10
  - b. 2 = 11-30
  - c. 3 = 31-100
  - d. 4 = >100
3. Free? Y/N
4. If no, how much does it cost?



- a. 1 = <100 GHC
- b. 2 = 100-500 GHC
- c. 3 = >500 GHC
5. 100% insurance covered? Y/N
6. Which insurance? 1 = NHIS 2 = Private, write
7. Do you conduct in house read of mammogram? Y/N
8. Who interprets mammograms? List all applicable
  - a. 1=Outside facility
  - b. 2=In house non radiologist (such as the surgeon)
  - c. 3=In house consultant radiologist
  - d. 4=In house specialist radiologist
  - e. 5=Other, please list.
9. If interpretation is at an external facility, indicate 1 or 2.
  - a. 1=Within Ghana
  - b. 2=Outside of Ghana
10. If outside of Ghana, write the name of the facility and the name of the country.
11. How long does it take for the patient to receive their results?
  - a. 1=<2 weeks
  - b. 2=2 weeks-1 month
  - c. 3=>1month

### Section B – 3 PAP and HPV

Yes/No answers should be recorded as Y or N

Available/Not Always Available should be indicated by 1 (Available) or 0 (Not always available) after the Y or N.

For example, Pap smear that exists but is not always available should be indicated as Y/0.

If there is no Pap smear at all, it should be indicated as N.

1. Does the facility offer Pap smears
2. HPV testing
3. Do the facility test for 16/18 specifically
4. Offer HPV vaccine
5. Who performs the HPV swab?
  - a. 1=Provider performed
  - b. 2=Patient performed

### Section C – 1 Breast Diagnostic Procedures

Yes/No answers should be recorded as Y or N

Available/Not Always Available should be indicated by 1 (Available) or 0 (Not always available) after the Y or N.

For example, FNA that exists but is not always available should be indicated as Y/0.

If there is no FNA at all, it should be indicated as N.

Does your facility perform the following:

1. Biopsy FNA
2. Biopsy core needle
3. Excisional biopsy
4. In house review of pathology results?
5. External review of pathology results?
6. If external, write the name and country.
7. How long does it take the patient to receive the results of the pathology report? Indicate using 1,2 or 3.

- a. 1=<1 month
  - b. 2=1-2 months
  - c. 3=>2 months
8. Does your facility stain for immunohistochemistry?
  9. If yes, does it stain for Estrogen Receptor (ER) and is it always available?
  10. Progesterone Receptor (PR) and always available?
  11. HER2 neu and always available?

### Section C – 2 Staging

1. Does your facility perform staging for breast and cervical cancer? Y/N
2. If yes, how is it performed
  - a. 1=With clinical exam (CE) only?
  - b. 2=Imaging + CE?
  - c. 3=Pathological staging?
3. If imaging is used, indicate which modalities (can list more than 1).
  - a. 1=XR
  - b. 2=CT
  - c. 3=US
  - d. 4=MRI
  - e. 5=PET

### Section C – 3 Breast Surgery

1. Does your center perform surgery for breast cancer? Indicate Y/N and if always available (1/0).
2. If yes do you offer the following? Y/N and note the availability (1/0)
  - a. 1=Wide Local Excision (WLE)/Lumpectomy
  - b. 2=Mastectomy
  - c. 3=Axillary surgery
3. If yes to axillary surgery, does your center perform sentinel lymph node mapping?
  - a. 1=with dye (such as isosulphan blue or Patent blue V [PBV])
  - b. 2=with radioactive isotope
4. Does your center offer reconstructive surgery for breast cancer? Y/N + 1/0
5. If yes, list which methods (list all applicable).
  - a. 1=Tissue Expander
  - b. 2=Rotational flap
  - c. 3=Free flap

### Section C – 4 Cervical Surgery and Procedures

Indicate Y/N and if always available (1/0)

1. Does your center offer surgery for cervical cancer?
2. If yes, what kind of surgery/
  - a. 1=Simple hysterectomy
  - b. 2=Radical hysterectomy
  - c. 3=Trachelectomy
3. Does your center offer Visual Inspection with Acetic Acid (VIA)?
4. Visual Inspection with Lugol's Iodine VILI?
5. Colposcopy?
6. Cryotherapy?
7. Cervical biopsy?



8. LEEP?
9. Cold Knife Cone?
10. Other, write.

#### Section D -1 Chemotherapy and Endocrine Therapy

1. Does your center offer chemotherapy? Y/N + 1/0
2. If yes, does it offer it for the following? Number plus availability using 1/0.
  - a. 1=Breast cancer only
  - b. 2=Cervical cancer
  - c. 3=Both breast cancer and cervical cancer
3. Which agents do you have? List all applicable
  - a. 1=Cyclophosphamide
  - b. 2=Doxorubicin (Adriamycin)
  - c. 3=5FU
  - d. 4=Methotrexate
  - e. 5=Epirubicin
  - f. 6=Docetaxel
  - g. 7=Paclitaxel
  - h. 8=Carboplatin
  - i. 9=Cisplatin
  - j. 10=Other, please specify
4. What combinations does your center use (such as CAF). Please write.
5. Does your center use endocrine therapy? Y/N + 1/0
6. If yes, which agents? List all applicable.
  - a. 1=Tamoxifen
  - b. 2=Anastrozole
  - c. 3=Esemestane
  - d. 4=Fulvestrant
  - e. 5=Goserelin
  - f. 6=Letrozole
  - g. 7=Other

#### Section D – 2 Radiation Therapy

1. Does your center offer radiation? Indicate with Y/N and availability with 1/0.
2. If yes what kind(s)?
  - a. 1=External beam
  - b. 2=Brachytherapy
  - c. 3=Other, list

#### Section D – 3 Follow Up

1. Does your center offer follow up with patients?
2. How do you conduct follow up?
  - a. 1 = Phone
  - b. 2 = Home visit
  - c. 3 = Clinical visit
  - d. 4 = Other, write
3. Does your facility maintain a cancer registry?
4. Does your facility perform cancer outreach?
5. Does your facility provide counseling?
6. Does your facility offer palliative care services?

1  
2  
3  
4  
5  
6  
7  
8  
9  
10  
11  
12  
13  
14  
15  
16  
17  
18  
19  
20  
21  
22  
23  
24  
25  
26  
27  
28  
29  
30  
31  
32  
33  
34  
35  
36  
37  
38  
39  
40  
41  
42  
43  
44  
45  
46  
47  
48  
49  
50  
51  
52  
53  
54  
55  
56  
57  
58  
59  
60STROBE Statement—Checklist of items that should be included in reports of *cross-sectional studies*

|                              | <b>Item No</b> | <b>Recommendation</b>                                                                                                                                                                                                                                                                                                                                                                                         |
|------------------------------|----------------|---------------------------------------------------------------------------------------------------------------------------------------------------------------------------------------------------------------------------------------------------------------------------------------------------------------------------------------------------------------------------------------------------------------|
| <b>Title and abstract</b>    | 1              | (a) Indicate the study's design with a commonly used term in the title or the abstract<br>(b) Provide in the abstract an informative and balanced summary of what was done and what was found                                                                                                                                                                                                                 |
| <b>Introduction</b>          |                |                                                                                                                                                                                                                                                                                                                                                                                                               |
| Background/rationale         | 2              | Explain the scientific background and rationale for the investigation being reported                                                                                                                                                                                                                                                                                                                          |
| Objectives                   | 3              | State specific objectives, including any prespecified hypotheses                                                                                                                                                                                                                                                                                                                                              |
| <b>Methods</b>               |                |                                                                                                                                                                                                                                                                                                                                                                                                               |
| Study design                 | 4              | Present key elements of study design early in the paper                                                                                                                                                                                                                                                                                                                                                       |
| Setting                      | 5              | Describe the setting, locations, and relevant dates, including periods of recruitment, exposure, follow-up, and data collection                                                                                                                                                                                                                                                                               |
| Participants                 | 6              | (a) Give the eligibility criteria, and the sources and methods of selection of participants                                                                                                                                                                                                                                                                                                                   |
| Variables                    | 7              | Clearly define all outcomes, exposures, predictors, potential confounders, and effect modifiers. Give diagnostic criteria, if applicable                                                                                                                                                                                                                                                                      |
| Data sources/<br>measurement | 8*             | For each variable of interest, give sources of data and details of methods of assessment (measurement). Describe comparability of assessment methods if there is more than one group                                                                                                                                                                                                                          |
| Bias                         | 9              | Describe any efforts to address potential sources of bias                                                                                                                                                                                                                                                                                                                                                     |
| Study size                   | 10             | Explain how the study size was arrived at                                                                                                                                                                                                                                                                                                                                                                     |
| Quantitative variables       | 11             | Explain how quantitative variables were handled in the analyses. If applicable, describe which groupings were chosen and why                                                                                                                                                                                                                                                                                  |
| Statistical methods          | 12             | (a) Describe all statistical methods, including those used to control for confounding<br>(b) Describe any methods used to examine subgroups and interactions<br>(c) Explain how missing data were addressed<br>(d) If applicable, describe analytical methods taking account of sampling strategy<br>(e) Describe any sensitivity analyses                                                                    |
| <b>Results</b>               |                |                                                                                                                                                                                                                                                                                                                                                                                                               |
| Participants                 | 13*            | (a) Report numbers of individuals at each stage of study—eg numbers potentially eligible, examined for eligibility, confirmed eligible, included in the study, completing follow-up, and analysed<br>(b) Give reasons for non-participation at each stage<br>(c) Consider use of a flow diagram                                                                                                               |
| Descriptive data             | 14*            | (a) Give characteristics of study participants (eg demographic, clinical, social) and information on exposures and potential confounders<br>(b) Indicate number of participants with missing data for each variable of interest                                                                                                                                                                               |
| Outcome data                 | 15*            | Report numbers of outcome events or summary measures                                                                                                                                                                                                                                                                                                                                                          |
| Main results                 | 16             | (a) Give unadjusted estimates and, if applicable, confounder-adjusted estimates and their precision (eg, 95% confidence interval). Make clear which confounders were adjusted for and why they were included<br>(b) Report category boundaries when continuous variables were categorized<br>(c) If relevant, consider translating estimates of relative risk into absolute risk for a meaningful time period |
| Other analyses               | 17             | Report other analyses done—eg analyses of subgroups and interactions, and sensitivity analyses                                                                                                                                                                                                                                                                                                                |

| <b>Discussion</b>        |    |                                                                                                                                                                            |
|--------------------------|----|----------------------------------------------------------------------------------------------------------------------------------------------------------------------------|
| Key results              | 18 | Summarise key results with reference to study objectives                                                                                                                   |
| Limitations              | 19 | Discuss limitations of the study, taking into account sources of potential bias or imprecision. Discuss both direction and magnitude of any potential bias                 |
| Interpretation           | 20 | Give a cautious overall interpretation of results considering objectives, limitations, multiplicity of analyses, results from similar studies, and other relevant evidence |
| Generalisability         | 21 | Discuss the generalisability (external validity) of the study results                                                                                                      |
| <b>Other information</b> |    |                                                                                                                                                                            |
| Funding                  | 22 | Give the source of funding and the role of the funders for the present study and, if applicable, for the original study on which the present article is based              |

\*Give information separately for exposed and unexposed groups.

**Note:** An Explanation and Elaboration article discusses each checklist item and gives methodological background and published examples of transparent reporting. The STROBE checklist is best used in conjunction with this article (freely available on the Web sites of PLoS Medicine at <http://www.plosmedicine.org/>, Annals of Internal Medicine at <http://www.annals.org/>, and Epidemiology at <http://www.epidem.com/>). Information on the STROBE Initiative is available at [www.strobe-statement.org](http://www.strobe-statement.org).
